# Supplementary material for: New efficient pecS-n (n = 1, 2) basis sets for quantum chemical calculations of 31P NMR chemical shifts
Source: Royal Society of Chemistry journal article supplement (doi:10.1039/d3cp02664g), 2023-01-01
Supplement: d3cp02664g1.pdf [file d3cp02664g1.pdf]

## Supplementary Material for paper

### “New efficient pecS-*n* (*n* = 1, 2) basis sets for quantum chemical calculations of <sup>31</sup>P NMR chemical shifts”

by

*Yuriy Yu. Rusakov and Irina L. Rusakova*

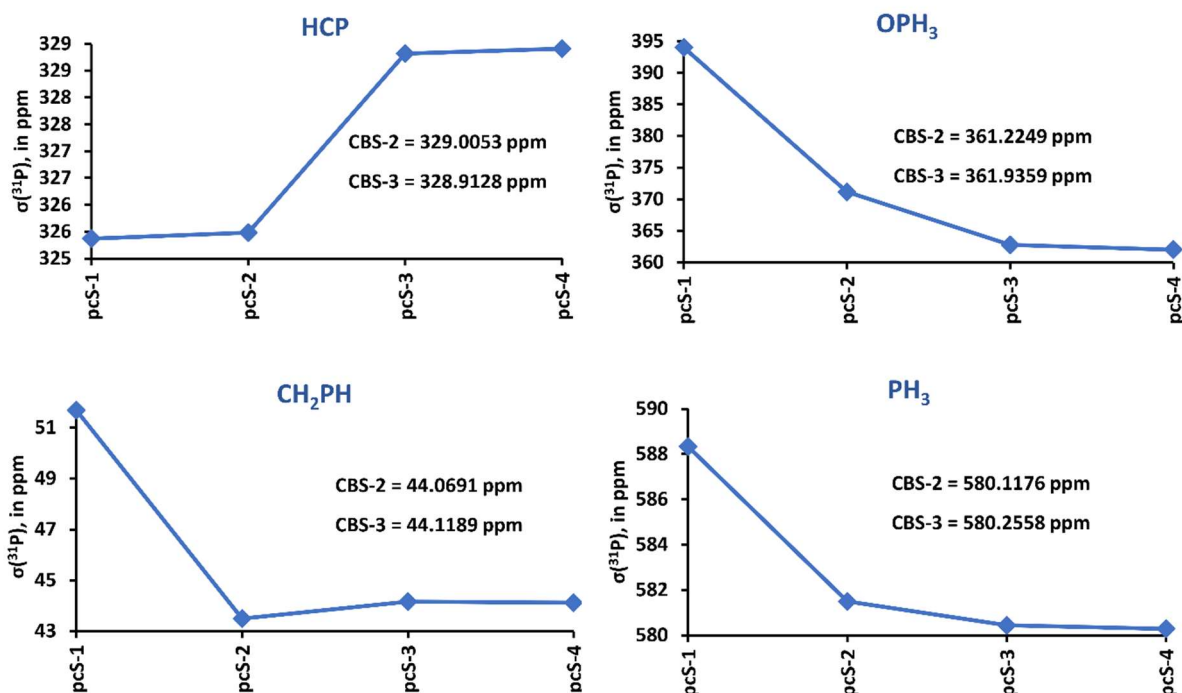

**Figure S1.** The dependence of the phosphorus shielding constants in the four fitting molecules on the basis set (from pcS-1 to pcS-4), calculated at the GIAO-DFT(PBE0) level of theory.

**Table S1.** Equilibrium geometries of twenty testing compounds obtained at the DFT(M06-2X) level using the pc-3 basis set within the IEF-PCM solvation model with the dielectric constants specified for a particular solvent.<sup>a</sup>

| #                              | Name                             | Structure | Cartesian Coordinates, Å        |
|--------------------------------|----------------------------------|-----------|---------------------------------|
| 1                              | 3,5-dimethyl-1,2-azaphosphinin e |           | P -0.015906 0.594800 -0.183640  |
|                                |                                  |           | C -2.602226 -1.013340 0.249790  |
|                                |                                  |           | C -2.696092 0.371310 0.172534   |
|                                |                                  |           | C -1.618786 1.227065 -0.020010  |
|                                |                                  |           | C -1.355418 -1.633953 0.130760  |
|                                |                                  |           | C -3.837432 -1.840935 0.460703  |
|                                |                                  |           | C -1.844463 2.713887 -0.087122  |
|                                |                                  |           | N -0.202470 -1.021034 -0.055750 |
|                                |                                  |           | H -3.685987 0.811565 0.270424   |
|                                |                                  |           | H -1.323484 -2.719465 0.196621  |
|                                |                                  |           | H -4.553204 -1.681457 -0.345139 |
| H -4.331165 -1.569778 1.393362 |                                  |           |                                 |
| H -3.599282 -2.901189 0.498404 |                                  |           |                                 |

|   |                                               |                                   |                                                                                                                                                                                                                                                                                                                                                                                                                                                                                                                                                                                            |
|---|-----------------------------------------------|-----------------------------------|--------------------------------------------------------------------------------------------------------------------------------------------------------------------------------------------------------------------------------------------------------------------------------------------------------------------------------------------------------------------------------------------------------------------------------------------------------------------------------------------------------------------------------------------------------------------------------------------|
|   |                                               |                                   | H -2.518094 2.964195 -0.906304<br>H -0.912291 3.254845 -0.240068<br>H -2.297442 3.076329 0.835337                                                                                                                                                                                                                                                                                                                                                                                                                                                                                          |
| 2 | (trichloromethyl) phosphine                   | $\text{H}_2\text{P}-\text{CCl}_3$ | P 1.856149 0.138887 0.000000<br>C -0.017460 -0.006360 0.000000<br>Cl -0.623721 0.823767 -1.449904<br>Cl -0.623721 -1.673587 0.000000<br>Cl -0.623721 0.823767 1.449904<br>H 2.036157 -0.801126 1.034842<br>H 2.036157 -0.801126 -1.034842                                                                                                                                                                                                                                                                                                                                                  |
| 3 | Dioxazaoctane                                 |                                   | P 1.193835 0.185772 0.000000<br>C -0.752245 0.443926 -1.674079<br>C -0.752245 -1.019632 -1.249198<br>C -0.752245 0.443926 1.674079<br>C -0.752245 -1.019632 1.249198<br>N 0.017730 -1.103725 0.000000<br>O 0.551841 0.919079 1.315989<br>O 0.551841 0.919079 -1.315989<br>H -0.877392 0.576814 -2.745191<br>H -1.510450 1.025709 -1.148240<br>H -0.260148 -1.619335 -2.014511<br>H -1.755627 -1.411842 -1.103659<br>H -1.510450 1.025709 1.148240<br>H -0.877392 0.576814 2.745191<br>H -1.755627 -1.411842 1.103659<br>H -0.260148 -1.619335 2.014511                                     |
| 4 | 1-methyl-1H-1,2,3,5-diazadiphosphole          |                                   | P 1.161103 -1.304270 0.000000<br>P -1.410896 -0.013462 0.000000<br>C -0.565409 -1.482623 0.000000<br>C -0.008905 2.371329 0.000000<br>N 0.000000 0.909395 0.000000<br>N 1.184435 0.331417 0.000000<br>H -1.069036 -2.437620 0.000000<br>H 0.503673 2.732190 0.887570<br>H 0.503673 2.732190 -0.887570<br>H -1.036573 2.721302 0.000000                                                                                                                                                                                                                                                     |
| 5 | 1H-1,2,4-diazaphosphole                       |                                   | P 1.271190 -0.011651 0.000000<br>C 0.000000 -1.173075 0.000000<br>C -0.008718 1.197730 0.000000<br>N -1.201888 -0.587542 0.000000<br>N -1.241744 0.742490 0.000000<br>H 0.046410 -2.249398 0.000000<br>H -2.083107 -1.076800 0.000000<br>H 0.126575 2.268391 0.000000                                                                                                                                                                                                                                                                                                                      |
| 6 | 2-methyl-[1,2,4]diazaphospholo[1,5-a]pyridine |                                   | P 0.826274 -0.019470 -2.535553<br>C -0.034267 -0.005221 1.269998<br>C 1.128318 0.002183 1.965770<br>C 2.361950 0.006578 1.269177<br>C 2.374046 0.002571 -0.092746<br>C 1.160969 -0.004561 -0.819377<br>C -0.877862 -0.021174 -2.087008<br>C -2.023360 -0.001395 -3.051561<br>N -0.007386 -0.007161 -0.095195<br>N -1.152957 -0.017960 -0.799439<br>H -1.019819 -0.009093 1.705645<br>H 1.096521 0.004703 3.043364<br>H 3.289010 0.013020 1.822652<br>H 3.301715 0.005131 -0.644875<br>H -1.763103 -0.507248 -3.977887<br>H -2.894379 -0.483619 -2.614507<br>H -2.291722 1.025692 -3.297389 |

|    |                              |                                                                                     |                                                                                                                                                                                                                                                                                                                                                                                                                                                                                                                                                                                            |
|----|------------------------------|-------------------------------------------------------------------------------------|--------------------------------------------------------------------------------------------------------------------------------------------------------------------------------------------------------------------------------------------------------------------------------------------------------------------------------------------------------------------------------------------------------------------------------------------------------------------------------------------------------------------------------------------------------------------------------------------|
| 7  | Dioxaphospholane             | 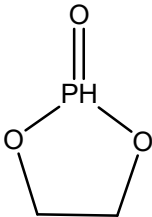   | P 2.101789 1.146898 0.826458<br>C 0.010196 0.029415 0.015978<br>C 0.002281 -0.017996 1.541986<br>O 1.359302 0.255795 1.922222<br>O 0.996351 1.015216 -0.315182<br>O 2.494321 2.499351 1.183144<br>H -0.941120 0.344261 -0.400255<br>H 0.303329 -0.927502 -0.413806<br>H -0.273106 -0.992516 1.931185<br>H -0.643752 0.748734 1.965147<br>H 3.169007 0.352641 0.423857                                                                                                                                                                                                                      |
| 8  | Diphosphine<br>(conformer 1) | $\text{H}_2\text{P}-\text{PH}_2$                                                    | P 0.010980 0.033753 -0.117395<br>P 0.020088 0.024996 2.111070<br>H 1.413199 -0.099607 -0.222485<br>H -0.190783 -1.360766 -0.211213<br>H -1.388514 0.072212 2.205613<br>H 0.135038 1.429416 2.213207                                                                                                                                                                                                                                                                                                                                                                                        |
|    | Diphosphine<br>(conformer 2) |                                                                                     | P 0.249138 0.107788 -0.066643<br>P -0.099970 -0.252934 2.088979<br>H 1.405016 -0.676041 -0.254618<br>H -0.633430 -0.902410 -0.497736<br>H 0.881726 0.661241 2.520057<br>H 0.720241 -1.383336 2.276658                                                                                                                                                                                                                                                                                                                                                                                      |
| 9  | methylidynephosphine         | $\text{HC}\equiv\text{P}$                                                           | P 0.000000 0.000000 0.534078<br>C 0.000000 0.000000 -0.991399<br>H 0.000000 0.000000 -2.062777                                                                                                                                                                                                                                                                                                                                                                                                                                                                                             |
| 10 | ethylidynephosphine          | $\text{H}_3\text{C}-\text{C}\equiv\text{P}$                                         | P 0.000000 0.000000 1.242663<br>C 0.000000 0.000000 -0.290806<br>C 0.000000 0.000000 -1.749185<br>H 0.000000 1.019508 -2.133332<br>H 0.882920 -0.509754 -2.133332<br>H -0.882920 -0.509754 -2.133332                                                                                                                                                                                                                                                                                                                                                                                       |
| 11 | phosphine oxide              |  | P -0.059433 0.102899 -0.041439<br>C 0.004413 -0.008019 1.759252<br>C 1.659827 -0.009132 -0.582175<br>C -0.821745 -1.440988 -0.581798<br>O -0.758470 1.313365 -0.535410<br>H -1.011951 -0.016586 2.147766<br>H 0.523677 -0.908238 2.082301<br>H 0.519829 0.867820 2.148208<br>H 1.686802 -0.017635 -1.669951<br>H 2.199158 0.866124 -0.225721<br>H 2.135478 -0.910371 -0.200094<br>H -0.828998 -1.468543 -1.669533<br>H -0.278840 -2.303535 -0.200171<br>H -1.849062 -1.472087 -0.224411                                                                                                    |
| 12 | phosphine                    | $\text{PH}_3$                                                                       | P 0.000000 0.000000 0.127360<br>H 0.000000 1.185876 -0.636799<br>H -1.026999 -0.592938 -0.636799<br>H 1.026999 -0.592938 -0.636799                                                                                                                                                                                                                                                                                                                                                                                                                                                         |
| 13 | 1-tert-butyl-1H-phosphindole |  | P -2.502517 0.471689 -1.156671<br>C 1.092599 -1.371883 0.998391<br>C 0.310558 -2.242044 0.244459<br>C -0.805629 -1.773674 -0.438775<br>C -1.155629 -0.434257 -0.339611<br>C -0.363924 0.443620 0.420954<br>C 0.766495 -0.026284 1.081879<br>C -0.871663 1.813497 0.412799<br>C -1.999746 1.981455 -0.292058<br>C -4.050951 -0.064177 -0.228211<br>C -4.416505 -1.466236 -0.714292<br>C -3.865427 -0.072520 1.285258<br>C -5.154051 0.921384 -0.616684<br>H 1.963786 -1.747008 1.516455<br>H 0.579241 -3.286929 0.179675<br>H -1.386431 -2.453391 -1.047913<br>H 1.381264 0.653435 1.656857 |

|    |                                 |                                                                                     |                                                                                                                                                                                                                                                                                                                                                                                                                                                                                          |
|----|---------------------------------|-------------------------------------------------------------------------------------|------------------------------------------------------------------------------------------------------------------------------------------------------------------------------------------------------------------------------------------------------------------------------------------------------------------------------------------------------------------------------------------------------------------------------------------------------------------------------------------|
|    |                                 |                                                                                     | H -0.358536 2.607932 0.939614<br>H -2.504749 2.929313 -0.403978<br>H -3.654641 -2.193538 -0.434403<br>H -4.543572 -1.495715 -1.796547<br>H -5.356414 -1.775326 -0.252682<br>H -4.795460 -0.389815 1.762425<br>H -3.612910 0.917951 1.660763<br>H -3.078428 -0.763568 1.585979<br>H -5.314638 0.937747 -1.694599<br>H -4.918347 1.933459 -0.287664<br>H -6.089777 0.623884 -0.139421                                                                                                      |
| 14 | Phosphinine<br>(Phosphobenzene) | 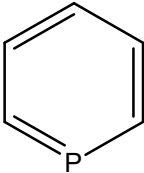   | P 0.000000 0.000000 1.473817<br>C 0.000000 1.326934 0.370616<br>C 0.000000 1.218161 -1.010531<br>C 0.000000 0.000000 -1.677915<br>C 0.000000 -1.218161 -1.010531<br>C 0.000000 -1.326934 0.370616<br>H 0.000000 2.320369 0.801414<br>H 0.000000 2.125019 -1.602462<br>H 0.000000 0.000000 -2.758696<br>H 0.000000 -2.125019 -1.602462<br>H 0.000000 -2.320369 0.801414                                                                                                                   |
| 15 | 1H-phosphole                    |   | P 0.167401 1.199740 0.000000<br>C -0.051740 -0.043030 -1.279140<br>C -0.051740 -1.272182 -0.728075<br>C -0.051740 -1.272182 0.728075<br>C -0.051740 -0.043030 1.279140<br>H -1.085759 1.843910 0.000000<br>H -0.041047 0.160680 -2.338044<br>H -0.050704 -2.189407 -1.300802<br>H -0.050704 -2.189407 1.300802<br>H -0.041047 0.160680 2.338044                                                                                                                                          |
| 16 | trimethylphosphine              |  | P 0.000000 0.000000 0.605003<br>C 0.000000 1.616549 -0.279671<br>C -1.399972 -0.808274 -0.279671<br>C 1.399972 -0.808274 -0.279671<br>H 0.880185 2.189045 0.007749<br>H 0.000000 1.484705 -1.362489<br>H -0.880185 2.189045 0.007749<br>H -1.455676 -1.856785 0.007749<br>H -2.335861 -0.332260 0.007749<br>H -1.285792 -0.742352 -1.362489<br>H 1.455676 -1.856785 0.007749<br>H 1.285792 -0.742352 -1.362489<br>H 2.335861 -0.332260 0.007749                                          |
| 17 | Phosphine selenide              |  | P -0.041998 0.073069 -0.029656<br>C 0.026041 -0.045212 1.775424<br>C 1.682683 -0.045503 -0.566808<br>C -0.802137 -1.479623 -0.566947<br>Se -1.038713 1.799735 -0.735746<br>H -0.989238 -0.057274 2.164286<br>H 0.550330 -0.951038 2.076831<br>H 0.542145 0.829113 2.164380<br>H 1.710355 -0.056597 -1.653664<br>H 2.221592 0.828685 -0.209701<br>H 2.141904 -0.951550 -0.173853<br>H -0.807378 -1.508676 -1.653808<br>H -0.246655 -2.330622 -0.175188<br>H -1.828248 -1.509432 -0.208727 |
| 18 | Phosphine sulfide               |  | P -0.045412 0.077960 -0.031208<br>C 0.020952 -0.035585 1.771397<br>C 1.675610 -0.035497 -0.571391<br>C -0.806892 -1.470738 -0.571011<br>S -0.970299 1.682478 -0.685898<br>H -0.994446 -0.043789 2.160133<br>H 0.541032 -0.942184 2.076130<br>H 0.541755 0.836940 2.158919                                                                                                                                                                                                                |

|    |                                          |                                                                                     |                                                                                                                                                                                                                                                                                                                                                                                                                                                                                                                                                                                            |
|----|------------------------------------------|-------------------------------------------------------------------------------------|--------------------------------------------------------------------------------------------------------------------------------------------------------------------------------------------------------------------------------------------------------------------------------------------------------------------------------------------------------------------------------------------------------------------------------------------------------------------------------------------------------------------------------------------------------------------------------------------|
|    |                                          |                                                                                     | H 1.702618 -0.044799 -1.658425<br>H 2.214441 0.837005 -0.209607<br>H 2.136034 -0.942074 -0.182285<br>H -0.807378 -1.501892 -1.657964<br>H -0.253483 -2.321558 -0.177137<br>H -1.833851 -1.501192 -0.214830                                                                                                                                                                                                                                                                                                                                                                                 |
| 19 | Trivinylphosphine oxide<br>(conformer 1) | $(\text{CH}_2=\text{CH})_3\text{PO}$                                                | P -0.087941 0.149678 -0.058430<br>C -0.013839 0.027942 1.733393<br>C 1.624226 0.027381 -0.591797<br>C -0.839264 -1.394354 -0.588943<br>C -0.559621 0.970643 2.487339<br>C 2.149204 0.970799 -1.359295<br>C -1.914149 -1.377659 -1.363033<br>O -0.787059 1.359117 -0.552428<br>H 0.485914 -0.829962 2.168934<br>H 2.202975 -0.830807 -0.269162<br>H -0.389366 -2.324571 -0.260849<br>H -0.528306 0.922723 3.567501<br>H -1.054189 1.820341 2.034531<br>H 3.175906 0.924177 -1.696550<br>H 1.554845 1.820232 -1.670400<br>H -2.386601 -2.290371 -1.700110<br>H -2.348857 -0.438332 -1.679905 |
|    | Trivinylphosphine oxide<br>(conformer 2) |                                                                                     | P -0.090043 0.151738 -0.029146<br>C -0.044192 0.039563 1.762819<br>C 1.621342 0.051651 -0.572265<br>C -0.810907 -1.401911 -0.571955<br>C -0.545499 1.023609 2.494928<br>C 2.666519 0.115820 0.240414<br>C -1.859254 -1.401416 -1.382279<br>O -0.808994 1.344397 -0.540074<br>H 0.374281 -0.850139 2.218763<br>H 1.759713 -0.039019 -1.644165<br>H -0.359937 -2.324362 -0.224099<br>H -0.553683 0.980624 3.575667<br>H -0.966419 1.901540 2.021534<br>H 3.678362 0.079667 -0.140762<br>H 2.550932 0.214513 1.311904<br>H -2.310938 -2.320948 -1.729552<br>H -2.294264 -0.468560 -1.717395   |
| 20 | methyl(vinyl)phosphine<br>(conformer 1)  | 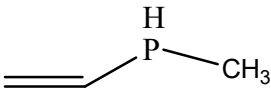 | P 1.853362 -0.033502 1.953204<br>C -0.075320 0.175546 -0.009783<br>C 0.185891 -0.201765 1.234492<br>C 2.052374 -1.714724 2.693555<br>H -1.062447 0.070454 -0.441618<br>H 0.692824 0.606975 -0.639822<br>H -0.602147 -0.636541 1.841917<br>H 1.460395 0.622182 3.142144<br>H 2.906806 -1.706765 3.367068<br>H 1.168836 -2.035351 3.240848<br>H 2.255202 -2.424947 1.895116                                                                                                                                                                                                                  |
|    | methyl(vinyl)phosphine<br>(conformer 2)  |                                                                                     | P 1.675997 -0.113954 2.144652<br>C -0.094992 -0.381026 -0.018138<br>C 0.200607 0.205294 1.135140<br>C 2.492698 1.542015 2.077253<br>H -1.032795 -0.192197 -0.524021<br>H 0.587503 -1.074189 -0.493977<br>H -0.516854 0.888559 1.579701<br>H 2.427556 -0.762414 1.142331<br>H 3.477641 1.468121 2.533252<br>H 2.586766 1.918329 1.062437<br>H 1.902298 2.241170 2.666248                                                                                                                                                                                                                    |

<sup>a</sup>The solvents were chosen in accordance with that used in the experimental NMR studies.

**Table S2.** The pecS-1 basis set for phosphorus atom in Dalton format.

```
$ P
a 15
$ s functions
12 5 0
9.624103E+04 2.5050E-04 6.9844E-05 2.0156E-05 0.00000000 0.00000000
1.433680E+04 1.9880E-03 5.3879E-04 1.2087E-04 0.00000000 0.00000000
3.207817E+03 1.0441E-02 2.8708E-03 6.6397E-04 0.00000000 0.00000000
9.113076E+02 4.1600E-02 1.1393E-02 2.6610E-03 0.00000000 0.00000000
2.994035E+02 1.3162E-01 3.9199E-02 9.4376E-03 0.00000000 0.00000000
1.079598E+02 3.1010E-01 9.9768E-02 2.3077E-02 0.00000000 0.00000000
4.193807E+01 4.1841E-01 1.9688E-01 4.5304E-02 0.00000000 0.00000000
1.715217E+01 2.2512E-01 1.1088E-01 2.7232E-02 0.00000000 0.00000000
4.768204E+00 1.5990E-02 -5.2681E-01 -1.5880E-01 0.00000000 0.00000000
1.781925E+00 -2.4702E-03 -6.0059E-01 -3.1982E-01 0.00000000 0.00000000
3.386647E-01 0.00000000 0.00000000 0.00000000 1.00000000 0.00000000
1.326649E-01 0.00000000 0.00000000 0.00000000 0.00000000 1.00000000
$ p functions
9 4 0
1.631865E+03 3.7407E-04 6.0339E-05 0.00000000 0.00000000
2.786509E+02 5.3117E-03 9.0933E-04 0.00000000 0.00000000
7.645439E+01 3.4379E-02 6.0515E-03 0.00000000 0.00000000
2.527413E+01 1.3692E-01 2.4440E-02 0.00000000 0.00000000
9.322672E+00 3.3067E-01 5.9536E-02 0.00000000 0.00000000
3.567954E+00 4.4178E-01 8.6276E-02 0.00000000 0.00000000
1.362871E+00 2.1890E-01 3.0239E-03 0.00000000 0.00000000
3.808971E-01 0.00000000 0.00000000 1.00000000 0.00000000
1.060116E-01 0.00000000 0.00000000 0.00000000 1.00000000
$ d functions
3 3 0
2.584314E+00 1.00000000 0.00000000 0.00000000
5.760276E-01 0.00000000 1.00000000 0.00000000
1.632577E-01 0.00000000 0.00000000 1.00000000
```

**Table S3.** The pecS-2 basis set for phosphorus atom in Dalton format.

|                |            |             |             |            |            |            |  |
|----------------|------------|-------------|-------------|------------|------------|------------|--|
| \$ P           |            |             |             |            |            |            |  |
| a 15           |            |             |             |            |            |            |  |
| \$ s functions |            |             |             |            |            |            |  |
| 15 6 0         |            |             |             |            |            |            |  |
| 3.047447E+05   | 5.9741E-05 | 1.9953E-05  | 3.0035E-06  | 0.00000000 | 0.00000000 | 0.00000000 |  |
| 4.452317E+04   | 4.7390E-04 | 1.2845E-04  | 3.0031E-05  | 0.00000000 | 0.00000000 | 0.00000000 |  |
| 1.024494E+04   | 2.4057E-03 | 6.4622E-04  | 1.5120E-04  | 0.00000000 | 0.00000000 | 0.00000000 |  |
| 2.995194E+03   | 9.5460E-03 | 2.6595E-03  | 6.1263E-04  | 0.00000000 | 0.00000000 | 0.00000000 |  |
| 9.979339E+02   | 3.3268E-02 | 9.2826E-03  | 2.1449E-03  | 0.00000000 | 0.00000000 | 0.00000000 |  |
| 3.613183E+02   | 9.8679E-02 | 2.8877E-02  | 6.7375E-03  | 0.00000000 | 0.00000000 | 0.00000000 |  |
| 1.398529E+02   | 2.3513E-01 | 7.5834E-02  | 1.7466E-02  | 0.00000000 | 0.00000000 | 0.00000000 |  |
| 5.749685E+01   | 3.7565E-01 | 1.4910E-01  | 3.5729E-02  | 0.00000000 | 0.00000000 | 0.00000000 |  |
| 2.462460E+01   | 3.1592E-01 | 1.9192E-01  | 4.5430E-02  | 0.00000000 | 0.00000000 | 0.00000000 |  |
| 1.051605E+01   | 7.0672E-02 | -3.4788E-02 | -7.6765E-03 | 0.00000000 | 0.00000000 | 0.00000000 |  |
| 4.293991E+00   | 1.8235E-03 | -5.3547E-01 | -1.7029E-01 | 0.00000000 | 0.00000000 | 0.00000000 |  |
| 1.800446E+00   | 6.3013E-04 | -5.1834E-01 | -2.6849E-01 | 0.00000000 | 0.00000000 | 0.00000000 |  |
| 6.456697E-01   | 0.00000000 | 0.00000000  | 0.00000000  | 1.00000000 | 0.00000000 | 0.00000000 |  |
| 3.085029E-01   | 0.00000000 | 0.00000000  | 0.00000000  | 0.00000000 | 1.00000000 | 0.00000000 |  |
| 1.259483E-01   | 0.00000000 | 0.00000000  | 0.00000000  | 0.00000000 | 0.00000000 | 1.00000000 |  |
| \$ p functions |            |             |             |            |            |            |  |
| 10 5 0         |            |             |             |            |            |            |  |
| 2.501047E+03   | 1.7954E-04 | 3.0118E-05  | 0.00000000  | 0.00000000 | 0.00000000 | 0.00000000 |  |
| 4.125818E+02   | 2.7706E-03 | 4.8392E-04  | 0.00000000  | 0.00000000 | 0.00000000 | 0.00000000 |  |
| 1.085274E+02   | 1.9980E-02 | 3.3721E-03  | 0.00000000  | 0.00000000 | 0.00000000 | 0.00000000 |  |
| 3.560937E+01   | 8.7359E-02 | 1.5145E-02  | 0.00000000  | 0.00000000 | 0.00000000 | 0.00000000 |  |
| 1.326035E+01   | 2.5192E-01 | 4.4984E-02  | 0.00000000  | 0.00000000 | 0.00000000 | 0.00000000 |  |
| 5.157181E+00   | 4.3614E-01 | 7.9740E-02  | 0.00000000  | 0.00000000 | 0.00000000 | 0.00000000 |  |
| 2.023144E+00   | 3.6101E-01 | 6.7662E-02  | 0.00000000  | 0.00000000 | 0.00000000 | 0.00000000 |  |
| 6.701044E-01   | 0.00000000 | 0.00000000  | 1.00000000  | 0.00000000 | 0.00000000 | 0.00000000 |  |
| 2.568871E-01   | 0.00000000 | 0.00000000  | 0.00000000  | 1.00000000 | 0.00000000 | 0.00000000 |  |
| 8.404583E-02   | 0.00000000 | 0.00000000  | 0.00000000  | 0.00000000 | 1.00000000 | 0.00000000 |  |
| \$ d functions |            |             |             |            |            |            |  |
| 4 4 0          |            |             |             |            |            |            |  |
| 4.501459E+00   | 1.00000000 | 0.00000000  | 0.00000000  | 0.00000000 | 0.00000000 | 0.00000000 |  |
| 1.126071E+00   | 0.00000000 | 1.00000000  | 0.00000000  | 0.00000000 | 0.00000000 | 0.00000000 |  |
| 3.989444E-01   | 0.00000000 | 0.00000000  | 1.00000000  | 0.00000000 | 0.00000000 | 0.00000000 |  |
| 1.545745E-01   | 0.00000000 | 0.00000000  | 0.00000000  | 1.00000000 | 0.00000000 | 0.00000000 |  |
| \$ f functions |            |             |             |            |            |            |  |
| 1 1 0          |            |             |             |            |            |            |  |
| 5.004978E-01   | 1.00000000 |             |             |            |            |            |  |

**Table S4.** Shielding constants calculated within GIAO-DFT(B97-2)/pecS-1 approach taking into account solvent and relativistic corrections, together with scaled  $\delta(^{31}\text{P})$  against experiment.

| Molecule        | Basic $\sigma_{\text{calc}}$ | $\Delta_{\text{solv}}\sigma$ | $\Delta_{\text{rel}}\sigma$ | $\sigma_{\text{calc}}(\text{total})$ | $\delta_{\text{scaled}}^b$ | $\delta_{\text{exp}}$ | Ref. <sup>c</sup> |
|-----------------|------------------------------|------------------------------|-----------------------------|--------------------------------------|----------------------------|-----------------------|-------------------|
| 1               | 46.5415                      | 6.7124                       | 10.5639                     | 63.8178                              | 258.3734                   | 263.3                 | [63]              |
| 2               | 343.1765                     | 1.9705                       | 11.5824                     | 356.7294                             | -23.7004                   | -12                   | [64]              |
| 3               | 177.4508                     | -7.0040                      | 12.6304                     | 183.0772                             | 143.5266                   | 139                   | [65]              |
| 4               | 49.9473                      | -1.2837                      | 9.9063                      | 58.5699                              | 263.4272                   | 265.1                 | [66]              |
|                 | 29.2087                      | 2.7341                       | 10.0887                     | 42.0315                              | 279.3537                   | 279.5                 |                   |
| 5               | 228.8470                     | 1.0903                       | 12.0950                     | 242.0323                             | 86.7529                    | 82.8                  | [67]              |
| 6               | 244.1158                     | 11.2691                      | 12.3738                     | 267.7587                             | 61.9784                    | 63                    | [68]              |
| 7               | 304.4077                     | -3.6598                      | 14.4231                     | 315.1710                             | 16.3203                    | 21.3                  | [69]              |
| 8 <sup>a</sup>  | 538.3327                     | 0.7015                       | 15.0480                     | 554.0821                             | -<br>213.7511              | -203.2                | [70]              |
| 9               | 344.2081                     | -2.6298                      | 13.3471                     | 354.9254                             | -21.9632                   | -32                   | [71]              |
| 10              | 364.1169                     | 4.3823                       | 12.7239                     | 381.2231                             | -47.2878                   | -61                   | [64]              |
| 11              | 299.1040                     | -6.0644                      | 14.8160                     | 307.8556                             | 23.3651                    | 31.5                  | [72]              |
| 12              | 581.3677                     | -                            | 14.3551                     | 595.7228                             | -<br>253.8511              | -266.1                | [73]              |
|                 |                              |                              |                             |                                      |                            |                       |                   |
| 13              | 288.2899                     | 0.8313                       | 13.2638                     | 302.3850                             | 28.6332                    | 23.5                  | [74]              |
| 14              | 93.0040                      | -4.0202                      | 11.1085                     | 100.0923                             | 223.4411                   | 211                   | [75]              |
| 15              | 363.2812                     | -3.1574                      | 13.5291                     | 373.6529                             | -39.9977                   | -49.2                 | [76, 77]          |
| 16              | 387.8544                     | -                            | 14.3417                     | 402.1961                             | -67.4848                   | -63.36                | [73]              |
| 17              | 279.7940                     | -2.8829                      | 61.1792                     | 338.0903                             | -5.7510                    | 5.74                  | [78]              |
| 18              | 287.9865                     | -5.5704                      | 21.3094                     | 303.7255                             | 27.3423                    | 30.57                 | [79]              |
| 19 <sup>a</sup> | 315.8578                     | -3.8793                      | 14.1829                     | 326.1614                             | 5.7366                     | 17.7                  | [80]              |
| 20 <sup>a</sup> | 397.9792                     | 1.0797                       | 14.0426                     | 413.1016                             | -77.9868                   | -80.5                 | [81]              |

<sup>a</sup> Conformational averaging; <sup>b</sup> Parameters of linear model  $\delta_{\text{scaled}} = A\sigma_{\text{calc}}(\text{total}) + B$ :  $A = -0.963$ ,  $B = 319.83$ ; <sup>c</sup> For references, see the original article.

**Table S5.** Shielding constants calculated within GIAO-DFT(B97-2)/pecS-2 approach taking into account solvent and relativistic corrections, together with scaled  $\delta(^{31}\text{P})$  against experiment.

| Molecule       | Basic $\sigma_{\text{calc}}$ | $\Delta_{\text{solv}}\sigma$ | $\Delta_{\text{rel}}\sigma$ | $\sigma_{\text{calc}}(\text{total})$ | $\delta_{\text{scaled}}^b$ | $\delta_{\text{exp}}$ | Ref. <sup>c</sup> |
|----------------|------------------------------|------------------------------|-----------------------------|--------------------------------------|----------------------------|-----------------------|-------------------|
| 1              | 42.0953                      | 7.5647                       | 10.5639                     | 60.2239                              | 259.8397                   | 263.3                 | [63]              |
| 2              | 335.3417                     | -0.1201                      | 11.5824                     | 346.804                              | -16.9680                   | -12                   | [64]              |
| 3              | 175.0887                     | -3.7822                      | 12.6304                     | 183.9369                             | 140.3453                   | 139                   | [65]              |
| 4              | 39.5021                      | 2.9776                       | 9.9063                      | 52.386                               | 267.4104                   | 265.1                 | [66]              |
|                | 22.3439                      | -0.1195                      | 10.0887                     | 32.3131                              | 286.7988                   | 279.5                 |                   |
| 5              | 222.4714                     | 8.5331                       | 12.0950                     | 243.0995                             | 83.2002                    | 82.8                  | [67]              |
| 6              | 241.5663                     | 11.671                       | 12.3738                     | 265.6111                             | 61.4562                    | 63                    | [68]              |
| 7              | 299.1151                     | -3.56                        | 14.4231                     | 309.9782                             | 18.6021                    | 21.3                  | [69]              |
| 8 <sup>a</sup> | 535.6006                     | 0.4499                       | 15.0480                     | 551.0986                             | -214.2961                  | -203.2                | [70]              |
| 9              | 343.4074                     | -1.156                       | 13.3471                     | 355.5985                             | -25.4626                   | -32                   | [71]              |
| 10             | 364.06                       | 9.9423                       | 12.7239                     | 386.7262                             | -55.5288                   | -61                   | [64]              |
| 11             | 291.2926                     | -5.9434                      | 14.8160                     | 300.1652                             | 28.0804                    | 31.5                  | [72]              |
| 12             | 578.9579                     | -                            | 14.3551                     | 593.313                              | -255.0710                  | -266.1                | [73]              |



|                       |          |         |         |          |          |        |          |
|-----------------------|----------|---------|---------|----------|----------|--------|----------|
| <b>13</b>             | 285.2994 | 0.7646  | 13.2638 | 299.3278 | 28.8893  | 23.5   | [74]     |
| <b>14</b>             | 93.1394  | 9.4773  | 11.1085 | 113.7252 | 208.1628 | 211    | [75]     |
| <b>15</b>             | 365.8414 | -0.7348 | 13.5291 | 378.6357 | -47.7142 | -49.2  | [76, 77] |
| <b>16</b>             | 379.9235 | -       | 14.3417 | 394.2652 | -62.8108 | -63.36 | [73]     |
| <b>17</b>             | 272.5472 | -2.7562 | 61.1792 | 330.9702 | -1.6741  | 5.74   | [78]     |
| <b>18</b>             | 282.1538 | -5.2056 | 21.3094 | 298.2576 | 29.9230  | 30.57  | [79]     |
| <b>19<sup>a</sup></b> | 309.0625 | -3.6826 | 14.1829 | 319.5627 | 9.3443   | 17.7   | [80]     |
| <b>20<sup>a</sup></b> | 392.8997 | 0.9335  | 14.0426 | 407.8758 | -75.9573 | -80.5  | [81]     |

<sup>a</sup> Conformational averaging; <sup>b</sup> Parameters of linear model  $\delta_{scaled} = A\sigma_{calc}(total) + B$ :  $A = -0.9659$ ,  $B = 318.01$ ; <sup>c</sup> For references, see the original article.

**Table S6.** Shielding constants calculated within GIAO-DFT(B97-2)/pcS-1 approach taking into account solvent and relativistic corrections, together with scaled  $\delta(^{31}\text{P})$  against experiment.

| Molecule              | Basic $\sigma_{calc}$ | $\Delta_{solv}\sigma$ | $\Delta_{rel}\sigma$ | $\sigma_{calc}(total)$ | $\delta_{scaled}^b$ | $\delta_{exp}$ | Ref. <sup>c</sup> |
|-----------------------|-----------------------|-----------------------|----------------------|------------------------|---------------------|----------------|-------------------|
| <b>1</b>              | 62.9288               | 7.6577                | 9.6765               | 80.2630                | 260.1123            | 263.3          | [63]              |
| <b>2</b>              | 353.1045              | 3.8253                | 10.4897              | 367.4195               | -16.9363            | -12            | [64]              |
| <b>3</b>              | 200.7152              | -6.4738               | 11.8594              | 206.1008               | 138.7039            | 139            | [65]              |
| <b>4</b>              | 64.6757               | -1.9811               | 9.1412               | 71.8358                | 268.2428            | 265.1          | [66]              |
|                       | 44.4551               | 2.7054                | 9.3077               | 56.4682                | 283.0695            | 279.5          |                   |
| <b>5</b>              | 239.2723              | 4.1346                | 11.1562              | 254.5631               | 91.9475             | 82.8           | [67]              |
| <b>6</b>              | 257.1133              | 11.6867               | 11.5186              | 280.3186               | 67.0986             | 63             | [68]              |
| <b>7</b>              | 328.3295              | -3.4332               | 13.5321              | 338.4284               | 11.0343             | 21.3           | [69]              |
| <b>8<sup>a</sup></b>  | 548.8960              | 1.5332                | 14.4035              | 564.8326               | -207.4005           | -203.2         | [70]              |
| <b>9</b>              | 344.2336              | -4.4419               | 12.2344              | 352.0261               | -2.0848             | -32            | [71]              |
| <b>10</b>             | 363.1188              | 1.2001                | 11.6816              | 376.0005               | -25.2153            | -61            | [64]              |
| <b>11</b>             | 328.9647              | -5.4308               | 13.7868              | 337.3207               | 12.1030             | 31.5           | [72]              |
| <b>12</b>             | 592.8267              | -                     | 14.0566              | 606.8833               | -247.9710           | -266.1         | [73]              |
| <b>13</b>             | 312.2851              | 1.3517                | 12.2510              | 325.8878               | 23.1335             | 23.5           | [74]              |
| <b>14</b>             | 111.7772              | 0.7435                | 10.1145              | 122.6352               | 219.2316            | 211            | [75]              |
| <b>15</b>             | 389.2228              | -1.1957               | 12.6025              | 400.6296               | -48.9774            | -49.2          | [76, 77]          |
| <b>16</b>             | 412.7016              | -                     | 13.2083              | 425.9099               | -73.3679            | -63.36         | [73]              |
| <b>17</b>             | 311.2617              | -2.7783               | 60.3884              | 368.8718               | -18.3375            | 5.74           | [78]              |
| <b>18</b>             | 319.9669              | -5.4889               | 20.2116              | 334.6896               | 14.6415             | 30.57          | [79]              |
| <b>19<sup>a</sup></b> | 342.7104              | -3.5364               | 13.0466              | 352.2206               | -2.2725             | 17.7           | [80]              |
| <b>20<sup>a</sup></b> | 417.9369              | 2.2575                | 12.8660              | 433.0604               | -80.2667            | -80.5          | [81]              |

<sup>a</sup> Conformational averaging; <sup>b</sup> Parameters of linear model  $\delta_{scaled} = A\sigma_{calc}(total) + B$ :  $A = -0.9648$ ,  $B = 337.55$ ; <sup>c</sup> For references, see the original article.

**Table S7.** Shielding constants calculated within GIAO-DFT(B97-2)/pcS-2 approach taking into account solvent and relativistic corrections, together with scaled  $\delta(^{31}\text{P})$  against experiment.

| Molecule | Basic $\sigma_{calc}$ | $\Delta_{solv}\sigma$ | $\Delta_{rel}\sigma$ | $\sigma_{calc}(total)$ | $\delta_{scaled}^b$ | $\delta_{exp}$ | Ref. <sup>c</sup> |
|----------|-----------------------|-----------------------|----------------------|------------------------|---------------------|----------------|-------------------|
| <b>1</b> | 41.4357               | 7.9579                | 9.6765               | 59.0701                | 258.8604            | 263.3          | [63]              |
| <b>2</b> | 336.5525              | 3.8545                | 10.4897              | 350.8967               | -20.5636            | -12            | [64]              |
| <b>3</b> | 177.1615              | -10.7715              | 11.8594              | 178.2494               | 144.7462            | 139            | [65]              |
| <b>4</b> | 41.3158               | -3.3907               | 9.1412               | 47.0663                | 270.3540            | 265.1          | [66]              |
|          | 26.0179               | 4.2436                | 9.3077               | 39.5692                | 277.5325            | 279.5          |                   |
| <b>5</b> | 223.3145              | 3.3815                | 11.1562              | 237.8522               | 87.6765             | 82.8           | [67]              |

|                 |          |         |         |          |           |        |          |
|-----------------|----------|---------|---------|----------|-----------|--------|----------|
| 6               | 241.5281 | 12.2658 | 11.5186 | 265.3125 | 61.3833   | 63     | [68]     |
| 7               | 302.7666 | -3.6045 | 13.5321 | 312.6942 | 16.0153   | 21.3   | [69]     |
| 8 <sup>a</sup>  | 534.5916 | 1.0804  | 14.4035 | 550.0755 | -211.2773 | -203.2 | [70]     |
| 9               | 338.041  | -2.5343 | 12.2344 | 347.7411 | -17.5421  | -32    | [71]     |
| 10              | 360.1485 | 8.7534  | 11.6816 | 380.5835 | -48.9887  | -61    | [64]     |
| 11              | 298.1572 | -5.9643 | 13.7868 | 305.9797 | 22.4444   | 31.5   | [72]     |
| 12              | 580.0163 | -       | 14.0566 | 594.0729 | -253.4048 | -266.1 | [73]     |
| 13              | 287.4716 | 0.9651  | 12.2510 | 300.6877 | 27.5115   | 23.5   | [74]     |
| 14              | 92.6741  | -2.7455 | 10.1145 | 100.0431 | 219.6287  | 211    | [75]     |
| 15              | 368.5608 | -3.3479 | 12.6025 | 377.8154 | -46.3382  | -49.2  | [76, 77] |
| 16              | 384.5311 | -       | 13.2083 | 397.7394 | -65.4155  | -63.36 | [73]     |
| 17              | 279.8574 | -2.6541 | 60.3884 | 337.5917 | -7.8241   | 5.74   | [78]     |
| 18              | 289.5204 | -5.1023 | 20.2116 | 304.6297 | 23.7371   | 30.57  | [79]     |
| 19 <sup>a</sup> | 315.2815 | -3.6636 | 13.0466 | 324.6646 | 4.5537    | 17.7   | [80]     |
| 20 <sup>a</sup> | 394.6743 | 1.5370  | 12.8660 | 409.0773 | -76.2715  | -80.5  | [81]     |

<sup>a</sup> Conformational averaging; <sup>b</sup> Parameters of linear model  $\delta_{scaled} = A\sigma_{calc}(total) + B$ ;  $A = -0.9575$ ,  $B = 315.42$ ; <sup>c</sup> For references, see the original article.

**Table S8.** Shielding constants calculated within GIAO-DFT(B97-2)/pcS-3 approach taking into account solvent and relativistic corrections, together with scaled  $\delta(^{31}\text{P})$  against experiment.

| Molecule        | Basic $\sigma_{calc}$ | $\Delta_{solv}\sigma$ | $\Delta_{rel}\sigma$ | $\sigma_{calc}(total)$ | $\delta_{scaled}^b$ | $\delta_{exp}$ | Ref. <sup>c</sup> |
|-----------------|-----------------------|-----------------------|----------------------|------------------------|---------------------|----------------|-------------------|
| 1               | 39.6332               | 7.7148                | 9.6765               | 57.0245                | 257.2863            | 263.3          | [63]              |
| 2               | 332.0392              | 3.4276                | 10.4897              | 345.9565               | -19.6839            | -12            | [64]              |
| 3               | 174.0166              | -9.0987               | 11.8594              | 176.7773               | 142.4913            | 139            | [65]              |
| 4               | 36.9461               | -2.2304               | 9.1412               | 43.8569                | 269.9088            | 265.1          | [66]              |
|                 | 21.1496               | 3.2088                | 9.3077               | 33.6661                | 279.6777            | 279.5          |                   |
| 5               | 220.598               | 3.8466                | 11.1562              | 235.6008               | 86.1031             | 82.8           | [67]              |
| 6               | 240.2356              | 12.1560               | 11.5186              | 263.9102               | 58.9657             | 63             | [68]              |
| 7               | 297.6557              | -3.5917               | 13.5321              | 307.5961               | 17.0884             | 21.3           | [69]              |
| 8 <sup>a</sup>  | 533.1891              | 0.5465                | 14.4035              | 548.1390               | -213.4961           | -203.2         | [70]              |
| 9               | 341.8616              | -4.3406               | 12.2344              | 349.7554               | -23.3255            | -32            | [71]              |
| 10              | 362.2833              | 2.1344                | 11.6816              | 376.0993               | -48.5788            | -61            | [64]              |
| 11              | 290.2143              | -5.9377               | 13.7868              | 298.0634               | 26.2264             | 31.5           | [72]              |
| 12              | 578.371               | -                     | 14.0566              | 592.4276               | -255.9511           | -266.1         | [73]              |
| 13              | 284.359               | 0.8358                | 12.2510              | 297.4458               | 26.8185             | 23.5           | [74]              |
| 14              | 90.1063               | -1.9716               | 10.1145              | 98.2492                | 217.7683            | 211            | [75]              |
| 15              | 364.3005              | -2.8617               | 12.6025              | 374.0413               | -46.6060            | -49.2          | [76, 77]          |
| 16              | 378.5736              | -                     | 13.2083              | 391.7819               | -63.6121            | -63.36         | [73]              |
| 17              | 272.4769              | -2.6879               | 60.3884              | 330.1774               | -4.5581             | 5.74           | [78]              |
| 18              | 281.8461              | -5.0908               | 20.2116              | 296.9669               | 27.2775             | 30.57          | [79]              |
| 19 <sup>a</sup> | 308.07191             | -3.6931               | 13.0466              | 317.4254               | 7.6660              | 17.7           | [80]              |
| 20 <sup>a</sup> | 389.7433              | 1.1461                | 12.8660              | 403.7554               | -75.0900            | -80.5          | [81]              |

<sup>a</sup> Conformational averaging; <sup>b</sup> Parameters of linear model  $\delta_{scaled} = A\sigma_{calc}(total) + B$ ;  $A = -0.9586$ ,  $B = 311.95$ ; <sup>c</sup> For references, see the original article.

**Table S9.** Shielding constants calculated within GIAO-DFT(PBE0)/pecS-1 approach taking into account solvent and relativistic corrections, together with scaled  $\delta(^{31}\text{P})$  against experiment.

| Molecule        | Basic $\sigma_{\text{calc}}$ | $\Delta_{\text{solv}}\sigma$ | $\Delta_{\text{rel}}\sigma$ | $\sigma_{\text{calc}}(\text{total})$ | $\delta_{\text{scaled}}^{\text{b}}$ | $\delta_{\text{exp}}$ | Ref. <sup>c</sup> |
|-----------------|------------------------------|------------------------------|-----------------------------|--------------------------------------|-------------------------------------|-----------------------|-------------------|
| 1               | 35.9367                      | 6.7565                       | 10.5639                     | 53.2571                              | 257.4816                            | 263.3                 | [63]              |
| 2               | 341.0777                     | 2.0816                       | 11.5824                     | 354.7417                             | -25.6125                            | -12                   | [64]              |
| 3               | 171.6166                     | -7.1892                      | 12.6304                     | 177.0578                             | 141.2327                            | 139                   | [65]              |
| 4               | 40.169                       | -1.3987                      | 9.9063                      | 48.6766                              | 261.7827                            | 265.1                 | [66]              |
|                 | 19.07                        | 2.7903                       | 10.0887                     | 31.9490                              | 277.4899                            | 279.5                 |                   |
| 5               | 220.6968                     | 0.9696                       | 12.0950                     | 233.7614                             | 87.9880                             | 82.8                  | [67]              |
| 6               | 237.2938                     | 11.4677                      | 12.3738                     | 261.1353                             | 62.2840                             | 63                    | [68]              |
| 7               | 297.5184                     | -3.7322                      | 14.4231                     | 308.2093                             | 18.0815                             | 21.3                  | [69]              |
| 8 <sup>a</sup>  | 542.4993                     | 0.7828                       | 15.0480                     | 558.3301                             | -216.7819                           | -203.2                | [70]              |
| 9               | 331.4684                     | -2.7602                      | 13.3471                     | 342.0553                             | -13.6999                            | -32                   | [71]              |
| 10              | 353.6658                     | 4.4533                       | 12.7239                     | 370.8430                             | -40.7316                            | -61                   | [64]              |
| 11              | 293.6873                     | -6.1926                      | 14.8160                     | 302.3107                             | 23.6203                             | 31.5                  | [72]              |
| 12              | 585.5154                     | 0.0000                       | 14.3551                     | 599.8705                             | -255.7884                           | -266.1                | [73]              |
| 13              | 284.0688                     | 0.8210                       | 13.2638                     | 298.1536                             | 27.5238                             | 23.5                  | [74]              |
| 14              | 82.2773                      | -4.3259                      | 11.1085                     | 89.0599                              | 223.8628                            | 211                   | [75]              |
| 15              | 359.6192                     | -3.2188                      | 13.5291                     | 369.9295                             | -39.8738                            | -49.2                 | [76, 77]          |
| 16              | 386.9944                     | 0.0000                       | 14.3417                     | 401.3361                             | -69.3646                            | -63.36                | [73]              |
| 17              | 275.5323                     | -2.8213                      | 61.1792                     | 333.8902                             | -6.0329                             | 5.74                  | [78]              |
| 18              | 283.3215                     | -5.5458                      | 21.3094                     | 299.0851                             | 26.6491                             | 30.57                 | [79]              |
| 19 <sup>a</sup> | 310.7647                     | -3.9681                      | 14.1829                     | 320.9795                             | 6.0903                              | 17.7                  | [80]              |
| 20 <sup>a</sup> | 397.2563                     | 1.0827                       | 14.0426                     | 412.3817                             | -79.7364                            | -80.5                 | [81]              |

<sup>a</sup> Conformational averaging; <sup>b</sup> Parameters of linear model  $\delta_{\text{scaled}} = A\sigma_{\text{calc}}(\text{total}) + B$ :  $A = -0.939$ ,  $B = 307.49$ ; <sup>c</sup> For references, see the original article.

**Table S10.** Shielding constants calculated within GIAO-DFT(PBE0)/pecS-2 approach taking into account solvent and relativistic corrections, together with scaled  $\delta(^{31}\text{P})$  against experiment.

| Molecule       | Basic $\sigma_{\text{calc}}$ | $\Delta_{\text{solv}}\sigma$ | $\Delta_{\text{rel}}\sigma$ | $\sigma_{\text{calc}}(\text{total})$ | $\delta_{\text{scaled}}^{\text{b}}$ | $\delta_{\text{exp}}$ | Ref. <sup>c</sup> |
|----------------|------------------------------|------------------------------|-----------------------------|--------------------------------------|-------------------------------------|-----------------------|-------------------|
| 1              | 32.1513                      | 7.6315                       | 10.5639                     | 50.3467                              | 259.1982                            | 263.3                 | [63]              |
| 2              | 334.0361                     | -0.0381                      | 11.5824                     | 345.5804                             | -19.0595                            | -12                   | [64]              |
| 3              | 169.6702                     | -3.8938                      | 12.6304                     | 178.4068                             | 138.5016                            | 139                   | [65]              |
| 4              | 30.4986                      | 2.9777                       | 9.9063                      | 43.3826                              | 265.7619                            | 265.1                 | [66]              |
|                | 13.1725                      | -0.1597                      | 10.0887                     | 23.1015                              | 284.8768                            | 279.5                 |                   |
| 5              | 215.1077                     | 8.6227                       | 12.0950                     | 235.8254                             | 84.3846                             | 82.8                  | [67]              |
| 6              | 235.7036                     | 11.8181                      | 12.3738                     | 259.8955                             | 61.6985                             | 63                    | [68]              |
| 7              | 292.4369                     | -3.6337                      | 14.4231                     | 303.2263                             | 20.8592                             | 21.3                  | [69]              |
| 8 <sup>a</sup> | 540.4447                     | 0.5120                       | 15.0480                     | 556.0047                             | -217.3844                           | -203.2                | [70]              |
| 9              | 330.9273                     | -1.2485                      | 13.3471                     | 343.0259                             | -16.6519                            | -32                   | [71]              |
| 10             | 354.1615                     | 10.1601                      | 12.7239                     | 377.0455                             | -48.7154                            | -61                   | [64]              |
| 11             | 286.6339                     | -6.0767                      | 14.8160                     | 295.3732                             | 28.2608                             | 31.5                  | [72]              |
| 12             | 583.9220                     | 0.0000                       | 14.3551                     | 598.2771                             | -257.2262                           | -266.1                | [73]              |
| 13             | 281.8583                     | 0.7703                       | 13.2638                     | 295.8924                             | 27.7714                             | 23.5                  | [74]              |
| 14             | 83.1144                      | 9.5379                       | 11.1085                     | 103.7608                             | 208.8554                            | 211                   | [75]              |
| 15             | 362.9929                     | -0.7841                      | 13.5291                     | 375.7379                             | -47.4830                            | -49.2                 | [76, 77]          |
| 16             | 380.0209                     | 0.0000                       | 14.3417                     | 394.3626                             | -65.0368                            | -63.36                | [73]              |

|                       |          |         |         |          |          |       |      |
|-----------------------|----------|---------|---------|----------|----------|-------|------|
| <b>17</b>             | 269.4901 | -2.6813 | 61.1792 | 327.9880 | -2.4787  | 5.74  | [78] |
| <b>18</b>             | 278.6979 | -5.1522 | 21.3094 | 294.8551 | 28.7491  | 30.57 | [79] |
| <b>19<sup>a</sup></b> | 304.6612 | -3.7732 | 14.1829 | 315.0709 | 9.6957   | 17.7  | [80] |
| <b>20<sup>a</sup></b> | 392.9316 | 0.9422  | 14.0426 | 407.9165 | -77.8113 | -80.5 | [81] |

<sup>a</sup> Conformational averaging; <sup>b</sup> Parameters of linear model  $\delta_{scaled} = A\sigma_{calc}(total) + B$ :  $A = -0.9425$ ,  $B = 306.65$ ; <sup>c</sup> For references, see the original article.

**Table S11.** Shielding constants calculated within GIAO-DFT(PBE0)/pcS-1 approach taking into account solvent and relativistic corrections, together with scaled  $\delta(^{31}\text{P})$  against experiment.

| Molecule              | Basic $\sigma_{calc}$ | $\Delta_{solv}\sigma$ | $\Delta_{rel}\sigma$ | $\sigma_{calc}(total)$ | $\delta_{scaled}^b$ | $\delta_{exp}$ | Ref. <sup>c</sup> |
|-----------------------|-----------------------|-----------------------|----------------------|------------------------|---------------------|----------------|-------------------|
| <b>1</b>              | 52.4421               | 7.7024                | 9.6765               | 69.8210                | 258.8770            | 263.3          | [63]              |
| <b>2</b>              | 351.2419              | 3.9872                | 10.4897              | 365.7188               | -18.7640            | -12            | [64]              |
| <b>3</b>              | 195.0188              | -6.6429               | 11.8594              | 200.2353               | 136.5092            | 139            | [65]              |
| <b>4</b>              | 55.2142               | -2.1635               | 9.1412               | 62.1919                | 266.0353            | 265.1          | [66]              |
|                       | 34.2799               | 2.7178                | 9.3077               | 46.3054                | 280.9416            | 279.5          |                   |
| <b>5</b>              | 231.3756              | 4.0501                | 11.1562              | 246.5819               | 93.0222             | 82.8           | [67]              |
| <b>6</b>              | 250.7758              | 11.8099               | 11.5186              | 274.1043               | 67.1979             | 63             | [68]              |
| <b>7</b>              | 321.5859              | -3.4933               | 13.5321              | 331.6247               | 13.2265             | 21.3           | [69]              |
| <b>8<sup>a</sup></b>  | 553.5335              | 1.6147                | 14.4035              | 569.5517               | -210.0203           | -203.2         | [70]              |
| <b>9</b>              | 331.0008              | -4.7325               | 12.2344              | 338.5027               | 6.7729              | -32            | [71]              |
| <b>10</b>             | 352.4558              | 1.1186                | 11.6816              | 365.2560               | -18.3297            | -61            | [64]              |
| <b>11</b>             | 324.5679              | -5.5453               | 13.7868              | 332.8094               | 12.1149             | 31.5           | [72]              |
| <b>12</b>             | 597.6455              | 0.0000                | 14.0566              | 611.7021               | -249.5701           | -266.1         | [73]              |
| <b>13</b>             | 308.4427              | 1.3564                | 12.2510              | 322.0501               | 22.2104             | 23.5           | [74]              |
| <b>14</b>             | 101.4432              | 0.5174                | 10.1145              | 112.0751               | 219.2299            | 211            | [75]              |
| <b>15</b>             | 386.1252              | -1.3155               | 12.6025              | 397.4122               | -48.5019            | -49.2          | [76, 77]          |
| <b>16</b>             | 412.6854              | 0.0000                | 13.2083              | 425.8937               | -75.2261            | -63.36         | [73]              |
| <b>17</b>             | 308.4363              | -2.7137               | 60.3884              | 366.1110               | -19.1320            | 5.74           | [78]              |
| <b>18</b>             | 316.7045              | -5.4655               | 20.2116              | 331.4506               | 13.3899             | 30.57          | [79]              |
| <b>19<sup>a</sup></b> | 338.1526              | -3.6181               | 13.0466              | 347.5810               | -1.7453             | 17.7           | [80]              |
| <b>20<sup>a</sup></b> | 417.8886              | 2.3126                | 12.8660              | 433.0672               | -81.9569            | -80.5          | [81]              |

<sup>a</sup> Conformational averaging; <sup>b</sup> Parameters of linear model  $\delta_{scaled} = A\sigma_{calc}(total) + B$ :  $A = -0.9383$ ,  $B = 324.39$ ; <sup>c</sup> For references, see the original article.

**Table S12.** Shielding constants calculated within GIAO-DFT(PBE0)/pcS-2 approach taking into account solvent and relativistic corrections, together with scaled  $\delta(^{31}\text{P})$  against experiment.

| Molecule             | Basic $\sigma_{calc}$ | $\Delta_{solv}\sigma$ | $\Delta_{rel}\sigma$ | $\sigma_{calc}(total)$ | $\delta_{scaled}^b$ | $\delta_{exp}$ | Ref. <sup>c</sup> |
|----------------------|-----------------------|-----------------------|----------------------|------------------------|---------------------|----------------|-------------------|
| <b>1</b>             | 29.8909               | 8.0132                | 9.6765               | 47.5806                | 258.0363            | 263.3          | [63]              |
| <b>2</b>             | 333.9888              | 4.0549                | 10.4897              | 348.5334               | -22.6322            | -12            | [64]              |
| <b>3</b>             | 170.4640              | -11.1252              | 11.8594              | 171.1982               | 142.7506            | 139            | [65]              |
| <b>4</b>             | 30.6857               | -3.6121               | 9.1412               | 36.2148                | 268.6361            | 265.1          | [66]              |
|                      | 15.1047               | 4.3002                | 9.3077               | 28.7126                | 275.6326            | 279.5          |                   |
| <b>5</b>             | 214.4670              | 3.2675                | 11.1562              | 228.8907               | 88.9465             | 82.8           | [67]              |
| <b>6</b>             | 234.2260              | 12.3938               | 11.5186              | 258.1384               | 61.6701             | 63             | [68]              |
| <b>7</b>             | 295.3715              | -3.6811               | 13.5321              | 305.2225               | 17.7595             | 21.3           | [69]              |
| <b>8<sup>a</sup></b> | 538.2854              | 1.1226                | 14.4035              | 553.8114               | -214.0745           | -203.2         | [70]              |
| <b>9</b>             | 324.3048              | -2.7274               | 12.2344              | 333.8118               | -8.9029             | -32            | [71]              |
| <b>10</b>            | 349.1424              | 8.8666                | 11.6816              | 369.6906               | -42.3635            | -61            | [64]              |

|                       |          |         |         |          |           |        |          |
|-----------------------|----------|---------|---------|----------|-----------|--------|----------|
| <b>11</b>             | 292.5673 | -6.1087 | 13.7868 | 300.2454 | 22.4011   | 31.5   | [72]     |
| <b>12</b>             | 583.9631 | 0.0000  | 14.0566 | 598.0197 | -255.3032 | -266.1 | [73]     |
| <b>13</b>             | 282.6042 | 0.9611  | 12.2510 | 295.8163 | 26.5317   | 23.5   | [74]     |
| <b>14</b>             | 81.0483  | -2.9899 | 10.1145 | 88.1729  | 220.1800  | 211    | [75]     |
| <b>15</b>             | 364.4445 | -3.4882 | 12.6025 | 373.5588 | -45.9709  | -49.2  | [76, 77] |
| <b>16</b>             | 383.2766 | 0.0000  | 13.2083 | 396.4849 | -67.3518  | -63.36 | [73]     |
| <b>17</b>             | 275.5048 | -2.5856 | 60.3884 | 333.3076 | -8.4327   | 5.74   | [78]     |
| <b>18</b>             | 284.8002 | -5.0814 | 20.2116 | 299.9304 | 22.6949   | 30.57  | [79]     |
| <b>19<sup>a</sup></b> | 309.9536 | -3.7649 | 13.0466 | 319.2353 | 4.6912    | 17.7   | [80]     |
| <b>20<sup>a</sup></b> | 393.5244 | 1.5535  | 12.8660 | 407.9439 | -78.0385  | -80.5  | [81]     |

<sup>a</sup> Conformational averaging; <sup>b</sup> Parameters of linear model  $\delta_{scaled} = A\sigma_{calc}(total) + B$ :  $A = -0.9326$ ,  $B = 302.41$ ; <sup>c</sup> For references, see the original article.

**Table S13.** Shielding constants calculated within GIAO-DFT(PBE0)/pcS-3 approach taking into account solvent and relativistic corrections, together with scaled  $\delta(^{31}\text{P})$  against experiment.

| Molecule              | Basic $\sigma_{calc}$ | $\Delta_{solv}\sigma$ | $\Delta_{rel}\sigma$ | $\sigma_{calc}(total)$ | $\delta_{scaled}^b$ | $\delta_{exp}$ | Ref. <sup>c</sup> |
|-----------------------|-----------------------|-----------------------|----------------------|------------------------|---------------------|----------------|-------------------|
| <b>1</b>              | 29.5420               | 7.7720                | 9.6765               | 46.9905                | 256.4521            | 263.3          | [63]              |
| <b>2</b>              | 330.7460              | 3.6425                | 10.4897              | 344.8782               | -21.8942            | -12            | [64]              |
| <b>3</b>              | 168.3889              | -9.3964               | 11.8594              | 170.8519               | 140.7160            | 139            | [65]              |
| <b>4</b>              | 27.7320               | -2.4683               | 9.1412               | 34.4049                | 268.2121            | 265.1          | [66]              |
|                       | 11.7922               | 3.2587                | 9.3077               | 24.3586                | 277.5993            | 279.5          |                   |
| <b>5</b>              | 213.1223              | 3.7040                | 11.1562              | 227.9825               | 87.3332             | 82.8           | [67]              |
| <b>6</b>              | 234.3925              | 12.2814               | 11.5186              | 258.1925               | 59.1049             | 63             | [68]              |
| <b>7</b>              | 290.9603              | -3.6624               | 13.5321              | 300.8300               | 19.2644             | 21.3           | [69]              |
| <b>8<sup>a</sup></b>  | 538.1049              | 0.6071                | 14.4035              | 553.1155               | -216.4711           | -203.2         | [70]              |
| <b>9</b>              | 329.4017              | -4.6941               | 12.2344              | 336.9420               | -14.4786            | -32            | [71]              |
| <b>10</b>             | 352.4122              | 1.9370                | 11.6816              | 366.0308               | -41.6592            | -61            | [64]              |
| <b>11</b>             | 285.5293              | -6.0743               | 13.7868              | 293.2418               | 26.3549             | 31.5           | [72]              |
| <b>12</b>             | 583.4222              | 0.0000                | 14.0566              | 597.4788               | -257.9242           | -266.1         | [73]              |
| <b>13</b>             | 280.8881              | 0.8279                | 12.2510              | 293.9670               | 25.6772             | 23.5           | [74]              |
| <b>14</b>             | 79.9226               | -2.3362               | 10.1145              | 87.7009                | 218.4123            | 211            | [75]              |
| <b>15</b>             | 361.4141              | -2.9828               | 12.6025              | 371.0338               | -46.3340            | -49.2          | [76, 77]          |
| <b>16</b>             | 378.4943              | 0.0000                | 13.2083              | 391.7026               | -65.6469            | -63.36         | [73]              |
| <b>17</b>             | 269.2249              | -2.6260               | 60.3884              | 326.9873               | -5.1769             | 5.74           | [78]              |
| <b>18</b>             | 278.1828              | -5.0760               | 20.2116              | 293.3184               | 26.2833             | 30.57          | [79]              |
| <b>19<sup>a</sup></b> | 303.6433              | -3.7836               | 13.0466              | 312.9062               | 7.9804              | 17.7           | [80]              |
| <b>20<sup>a</sup></b> | 389.7703              | 1.1603                | 12.8660              | 403.7967               | -76.9476            | -80.5          | [81]              |

<sup>a</sup> Conformational averaging; <sup>b</sup> Parameters of linear model  $\delta_{scaled} = A\sigma_{calc}(total) + B$ :  $A = -0.9344$ ,  $B = 300.36$ ; <sup>c</sup> For references, see the original article.

**Table S14.** Shielding constants calculated within GIAO-DFT(B3LYP)/pcS-1 approach taking into account solvent and relativistic corrections, together with scaled  $\delta(^{31}\text{P})$  against experiment.

| Molecule | Basic $\sigma_{calc}$ | $\Delta_{solv}\sigma$ | $\Delta_{rel}\sigma$ | $\sigma_{calc}(total)$ | $\delta_{scaled}^b$ | $\delta_{exp}$ | Ref. <sup>c</sup> |
|----------|-----------------------|-----------------------|----------------------|------------------------|---------------------|----------------|-------------------|
| <b>1</b> | 19.9966               | 6.4064                | 10.5639              | 36.9669                | 257.3617            | 263.3          | [63]              |
| <b>2</b> | 316.3883              | 2.3355                | 11.5824              | 330.3062               | -20.7533            | -12            | [64]              |
| <b>3</b> | 154.2623              | -7.2767               | 12.6304              | 159.6160               | 141.0781            | 139            | [65]              |

|                 |          |         |         |          |           |        |          |
|-----------------|----------|---------|---------|----------|-----------|--------|----------|
| 4               | 21.5309  | -1.2907 | 9.9063  | 30.1465  | 263.8281  | 265.1  | [66]     |
|                 | 1.3897   | 3.0537  | 10.0887 | 14.5321  | 278.6321  | 279.5  |          |
| 5               | 201.9066 | 1.0309  | 12.0950 | 215.0325 | 88.5377   | 82.8   | [67]     |
| 6               | 216.8101 | 11.1024 | 12.3738 | 240.2863 | 64.5946   | 63     | [68]     |
| 7               | 288.6754 | -3.8396 | 14.4231 | 299.2589 | 8.6826    | 21.3   | [69]     |
| 8 <sup>a</sup>  | 515.322  | 0.5655  | 15.0480 | 530.9355 | -210.9700 | -203.2 | [70]     |
| 9               | 327.5695 | -2.6149 | 13.3471 | 338.3017 | -28.3338  | -32    | [71]     |
| 10              | 350.26   | 4.5196  | 12.7239 | 367.5035 | -56.0201  | -61    | [64]     |
| 11              | 277.8998 | -6.3246 | 14.8160 | 286.3912 | 20.8825   | 31.5   | [72]     |
| 12              | 565.0259 | 0.0000  | 14.3551 | 579.3810 | -256.9011 | -266.1 | [73]     |
| 13              | 259.1682 | 0.8255  | 13.2638 | 273.2575 | 33.3346   | 23.5   | [74]     |
| 14              | 64.041   | -4.2074 | 11.1085 | 70.9421  | 225.1498  | 211    | [75]     |
| 15              | 338.7429 | -2.7799 | 13.5291 | 349.4921 | -38.9435  | -49.2  | [76, 77] |
| 16              | 359.4592 | 0.0000  | 14.3417 | 373.8009 | -61.9906  | -63.36 | [73]     |
| 17              | 250.8511 | -2.9979 | 61.1792 | 309.0324 | -0.5836   | 5.74   | [78]     |
| 18              | 261.0056 | -5.8498 | 21.3094 | 276.4652 | 30.2933   | 30.57  | [79]     |
| 19 <sup>a</sup> | 296.0029 | -4.0332 | 14.1829 | 306.1526 | 2.1467    | 17.7   | [80]     |
| 20 <sup>a</sup> | 370.4929 | 0.9984  | 14.0426 | 385.5340 | -73.1148  | -80.5  | [81]     |

<sup>a</sup> Conformational averaging; <sup>b</sup> Parameters of linear model  $\delta_{scaled} = A\sigma_{calc}(total) + B$ :  $A = -0.9481$ ,  $B = 292.41$ ; <sup>c</sup> For references, see the original article.

**Table S15.** Shielding constants calculated within GIAO-DFT(B3LYP)/pcS-2 approach taking into account solvent and relativistic corrections, together with scaled  $\delta(^{31}\text{P})$  against experiment.

| Molecule        | Basic $\sigma_{calc}$ | $\Delta_{solv}\sigma$ | $\Delta_{rel}\sigma$ | $\sigma_{calc}(total)$ | $\delta_{scaled}^b$ | $\delta_{exp}$ | Ref. <sup>c</sup> |
|-----------------|-----------------------|-----------------------|----------------------|------------------------|---------------------|----------------|-------------------|
| 1               | 13.8344               | 7.2068                | 10.5639              | 31.6051                | 258.3626            | 263.3          | [63]              |
| 2               | 306.1254              | -0.1418               | 11.5824              | 317.5660               | -12.8714            | -12            | [64]              |
| 3               | 151.2068              | -3.7043               | 12.6304              | 160.1329               | 136.4539            | 139            | [65]              |
| 4               | 9.5298                | 3.0163                | 9.9063               | 22.4524                | 267.0439            | 265.1          | [66]              |
|                 | -6.7351               | -0.7081               | 10.0887              | 2.6455                 | 285.8307            | 279.5          |                   |
| 5               | 193.5690              | 8.1245                | 12.0950              | 213.7885               | 85.5616             | 82.8           | [67]              |
| 6               | 212.5045              | 11.4583               | 12.3738              | 236.3366               | 64.1747             | 63             | [68]              |
| 7               | 282.2482              | -3.7920               | 14.4231              | 292.8793               | 10.5440             | 21.3           | [69]              |
| 8 <sup>a</sup>  | 512.3086              | 0.2984                | 15.0480              | 527.6551               | -212.1408           | -203.2         | [70]              |
| 9               | 324.9382              | -1.3269               | 13.3471              | 336.9584               | -31.2650            | -32            | [71]              |
| 10              | 348.7374              | 9.9915                | 12.7239              | 371.4528               | -63.9830            | -61            | [64]              |
| 11              | 268.2663              | -6.2774               | 14.8160              | 276.8049               | 25.7906             | 31.5           | [72]              |
| 12              | 562.8833              | 0.0000                | 14.3551              | 577.2384               | -259.1706           | -266.1         | [73]              |
| 13              | 254.2906              | 0.7356                | 13.2638              | 268.2900               | 33.8669             | 23.5           | [74]              |
| 14              | 61.8994               | 9.4478                | 11.1085              | 82.4557                | 210.1308            | 211            | [75]              |
| 15              | 340.0481              | -0.7707               | 13.5291              | 352.8065               | -46.2970            | -49.2          | [76, 77]          |
| 16              | 349.4778              | 0.0000                | 14.3417              | 363.8195               | -56.7428            | -63.36         | [73]              |
| 17              | 241.7323              | -2.8571               | 61.1792              | 300.0544               | 3.7384              | 5.74           | [78]              |
| 18              | 253.6185              | -5.4570               | 21.3094              | 269.4709               | 32.7469             | 30.57          | [79]              |
| 19 <sup>a</sup> | 287.8825              | -3.8793               | 14.1829              | 298.1860               | 5.5106              | 17.7           | [80]              |
| 20 <sup>a</sup> | 363.5121              | 0.8561                | 14.0426              | 378.4109               | -70.5827            | -80.5          | [81]              |

<sup>a</sup> Conformational averaging; <sup>b</sup> Parameters of linear model  $\delta_{scaled} = A\sigma_{calc}(total) + B$ :  $A = -0.9485$ ,  $B = 288.34$ ; <sup>c</sup> For references, see the original article.

**Table S16.** Shielding constants calculated within GIAO-DFT(B3LYP)/pcS-1 approach taking into account solvent and relativistic corrections, together with scaled  $\delta(^{31}\text{P})$  against experiment.

| Molecule        | Basic $\sigma_{\text{calc}}$ | $\Delta_{\text{solv}}\sigma$ | $\Delta_{\text{rel}}\sigma$ | $\sigma_{\text{calc}}(\text{total})$ | $\delta_{\text{scaled}}^{\text{b}}$ | $\delta_{\text{exp}}$ | Ref. <sup>c</sup> |
|-----------------|------------------------------|------------------------------|-----------------------------|--------------------------------------|-------------------------------------|-----------------------|-------------------|
| 1               | 37.4027                      | 7.3650                       | 9.6765                      | 54.4442                              | 259.0915                            | 263.3                 | [63]              |
| 2               | 328.0375                     | 4.1738                       | 10.4897                     | 342.7010                             | -14.2048                            | -12                   | [64]              |
| 3               | 179.2604                     | -6.5484                      | 11.8594                     | 184.5714                             | 135.7179                            | 139                   | [65]              |
| 4               | 37.7968                      | -1.8605                      | 9.1412                      | 45.0775                              | 267.9720                            | 265.1                 | [66]              |
|                 | 17.7825                      | 3.0276                       | 9.3077                      | 30.1178                              | 282.1553                            | 279.5                 |                   |
| 5               | 212.0529                     | 4.1847                       | 11.1562                     | 227.3938                             | 95.1179                             | 82.8                  | [67]              |
| 6               | 229.6621                     | 11.4164                      | 11.5186                     | 252.5971                             | 71.2227                             | 63                    | [68]              |
| 7               | 313.7862                     | -3.5960                      | 13.5321                     | 323.7223                             | 3.7889                              | 21.3                  | [69]              |
| 8 <sup>a</sup>  | 528.8293                     | 1.3049                       | 14.4035                     | 544.5376                             | -205.5661                           | -203.2                | [70]              |
| 9               | 326.0055                     | -4.4420                      | 12.2344                     | 333.7979                             | -5.7638                             | -32                   | [71]              |
| 10              | 347.6120                     | 1.5274                       | 11.6816                     | 360.8210                             | -31.3844                            | -61                   | [64]              |
| 11              | 310.5410                     | -5.6093                      | 13.7868                     | 318.7185                             | 8.5330                              | 31.5                  | [72]              |
| 12              | 579.8018                     | 0.0000                       | 14.0566                     | 593.8584                             | -252.3271                           | -266.1                | [73]              |
| 13              | 284.9464                     | 1.2838                       | 12.2510                     | 298.4812                             | 27.7200                             | 23.5                  | [74]              |
| 14              | 83.0317                      | 1.1060                       | 10.1145                     | 94.2522                              | 221.3495                            | 211                   | [75]              |
| 15              | 366.9029                     | -0.7682                      | 12.6025                     | 378.7372                             | -48.3707                            | -49.2                 | [76, 77]          |
| 16              | 386.8441                     | 0.0000                       | 13.2083                     | 400.0524                             | -68.5797                            | -63.36                | [73]              |
| 17              | 285.1606                     | -2.8156                      | 60.3884                     | 342.7334                             | -14.2355                            | 5.74                  | [78]              |
| 18              | 295.8301                     | -5.6704                      | 20.2116                     | 310.3713                             | 16.4470                             | 30.57                 | [79]              |
| 19 <sup>a</sup> | 325.1561                     | -3.6522                      | 13.0466                     | 334.5505                             | -6.4773                             | 17.7                  | [80]              |
| 20 <sup>a</sup> | 392.3997                     | 2.1150                       | 12.8660                     | 407.3807                             | -75.5277                            | -80.5                 | [81]              |

<sup>a</sup> Conformational averaging; <sup>b</sup> Parameters of linear model  $\delta_{\text{scaled}} = A\sigma_{\text{calc}}(\text{total}) + B$ ;  $A = -0.9481$ ,  $B = 310.71$ ; <sup>c</sup> For references, see the original article.

**Table S17.** Shielding constants calculated within GIAO-DFT(B3LYP)/pcS-2 approach taking into account solvent and relativistic corrections, together with scaled  $\delta(^{31}\text{P})$  against experiment.

| Molecule       | Basic $\sigma_{\text{calc}}$ | $\Delta_{\text{solv}}\sigma$ | $\Delta_{\text{rel}}\sigma$ | $\sigma_{\text{calc}}(\text{total})$ | $\delta_{\text{scaled}}^{\text{b}}$ | $\delta_{\text{exp}}$ | Ref. <sup>c</sup> |
|----------------|------------------------------|------------------------------|-----------------------------|--------------------------------------|-------------------------------------|-----------------------|-------------------|
| 1              | 9.3506                       | 7.5874                       | 9.6765                      | 26.6145                              | 257.7962                            | 263.3                 | [63]              |
| 2              | 304.4793                     | 4.4444                       | 10.4897                     | 319.4134                             | -16.7320                            | -12                   | [64]              |
| 3              | 149.7359                     | -11.0414                     | 11.8594                     | 150.5539                             | 141.5907                            | 139                   | [65]              |
| 4              | 7.3767                       | -3.3728                      | 9.1412                      | 13.1451                              | 270.4252                            | 265.1                 | [66]              |
|                | -6.9942                      | 4.7793                       | 9.3077                      | 7.0928                               | 276.0998                            | 279.5                 |                   |
| 5              | 191.4383                     | 3.6228                       | 11.1562                     | 206.2173                             | 89.4007                             | 82.8                  | [67]              |
| 6              | 209.4162                     | 12.0689                      | 11.5186                     | 233.0037                             | 64.2857                             | 63                    | [68]              |
| 7              | 283.4109                     | -3.8601                      | 13.5321                     | 293.0829                             | 7.9555                              | 21.3                  | [69]              |
| 8 <sup>a</sup> | 509.4859                     | 0.8441                       | 14.4035                     | 524.7334                             | -209.2401                           | -203.2                | [70]              |
| 9              | 316.6576                     | -2.7036                      | 12.2344                     | 326.1884                             | -23.0842                            | -32                   | [71]              |
| 10             | 342.1592                     | 8.8662                       | 11.6816                     | 362.7070                             | -57.3241                            | -61                   | [64]              |
| 11             | 272.8429                     | -6.3194                      | 13.7868                     | 280.3103                             | 19.9311                             | 31.5                  | [72]              |
| 12             | 562.8068                     | 0.0000                       | 14.0566                     | 576.8634                             | -258.1171                           | -266.1                | [73]              |
| 13             | 253.3454                     | 0.9068                       | 12.2510                     | 266.5032                             | 32.8766                             | 23.5                  | [74]              |
| 14             | 57.7225                      | -2.1721                      | 10.1145                     | 65.6649                              | 221.1826                            | 211                   | [75]              |
| 15             | 340.1934                     | -2.8036                      | 12.6025                     | 349.9923                             | -45.4028                            | -49.2                 | [76, 77]          |
| 16             | 351.7117                     | 0.0000                       | 13.2083                     | 364.9200                             | -59.3990                            | -63.36                | [73]              |

|                       |          |         |         |          |          |       |      |
|-----------------------|----------|---------|---------|----------|----------|-------|------|
| <b>17</b>             | 246.5557 | -2.7682 | 60.3884 | 304.1759 | -2.4453  | 5.74  | [78] |
| <b>18</b>             | 258.4300 | -5.4021 | 20.2116 | 273.2395 | 26.5606  | 30.57 | [79] |
| <b>19<sup>a</sup></b> | 291.7252 | -3.8797 | 13.0466 | 300.8920 | 0.6336   | 17.7  | [80] |
| <b>20<sup>a</sup></b> | 362.5963 | 1.4065  | 12.8660 | 376.8689 | -70.6023 | -80.5 | [81] |

<sup>a</sup> Conformational averaging; <sup>b</sup> Parameters of linear model  $\delta_{scaled} = A\sigma_{calc}(total) + B$ :  $A = -0.9376$ ,  $B = 282.75$ ; <sup>c</sup> For references, see the original article.

**Table S18.** Shielding constants calculated within GIAO-DFT(B3LYP)/pcS-3 approach taking into account solvent and relativistic corrections, together with scaled  $\delta(^{31}\text{P})$  against experiment.

| Molecule              | Basic $\sigma_{calc}$ | $\Delta_{solv}\sigma$ | $\Delta_{rel}\sigma$ | $\sigma_{calc}(total)$ | $\delta_{scaled}^b$ | $\delta_{exp}$ | Ref. <sup>c</sup> |
|-----------------------|-----------------------|-----------------------|----------------------|------------------------|---------------------|----------------|-------------------|
| <b>1</b>              | 11.6373               | 7.3646                | 9.6765               | 28.6784                | 256.1734            | 263.3          | [63]              |
| <b>2</b>              | 304.2917              | 4.1378                | 10.4897              | 318.9192               | -17.5527            | -12            | [64]              |
| <b>3</b>              | 149.5214              | -9.6011               | 11.8594              | 151.7797               | 140.0766            | 139            | [65]              |
| <b>4</b>              | 7.2738                | -2.4376               | 9.1412               | 13.9774                | 270.0379            | 265.1          | [66]              |
|                       | -8.3022               | 3.7887                | 9.3077               | 4.7942                 | 278.6986            | 279.5          |                   |
| <b>5</b>              | 193.5140              | 3.9342                | 11.1562              | 208.6044               | 86.4852             | 82.8           | [67]              |
| <b>6</b>              | 212.4982              | 11.9766               | 11.5186              | 235.9934               | 60.6546             | 63             | [68]              |
| <b>7</b>              | 280.0931              | -3.8308               | 13.5321              | 289.7944               | 9.9149              | 21.3           | [69]              |
| <b>8<sup>a</sup></b>  | 509.1259              | 0.3803                | 14.4035              | 523.9096               | -210.8792           | -203.2         | [70]              |
| <b>9</b>              | 322.8467              | -4.4547               | 12.2344              | 330.6264               | -28.5938            | -32            | [71]              |
| <b>10</b>             | 346.5666              | 1.9962                | 11.6816              | 360.2444               | -56.5265            | -61            | [64]              |
| <b>11</b>             | 267.2474              | -6.2721               | 13.7868              | 274.7621               | 24.0919             | 31.5           | [72]              |
| <b>12</b>             | 562.0656              | 0.0000                | 14.0566              | 576.1222               | -260.1208           | -266.1         | [73]              |
| <b>13</b>             | 253.5399              | 0.7918                | 12.2510              | 266.5827               | 31.8059             | 23.5           | [74]              |
| <b>14</b>             | 59.0696               | -1.9381               | 10.1145              | 67.2460                | 219.8003            | 211            | [75]              |
| <b>15</b>             | 338.4128              | -2.4742               | 12.6025              | 348.5411               | -45.4891            | -49.2          | [76, 77]          |
| <b>16</b>             | 348.0608              | 0.0000                | 13.2083              | 361.2691               | -57.4929            | -63.36         | [73]              |
| <b>17</b>             | 241.7743              | -2.7834               | 60.3884              | 299.3793               | 0.8754              | 5.74           | [78]              |
| <b>18</b>             | 253.2383              | -5.3631               | 20.2116              | 268.0868               | 30.3873             | 30.57          | [79]              |
| <b>19<sup>a</sup></b> | 286.9762              | -3.8830               | 13.0466              | 296.1398               | 3.9305              | 17.7           | [80]              |
| <b>20<sup>a</sup></b> | 360.3823              | 1.0614                | 12.8660              | 374.3098               | -69.7915            | -80.5          | [81]              |

<sup>a</sup> Conformational averaging; <sup>b</sup> Parameters of linear model  $\delta_{scaled} = A\sigma_{calc}(total) + B$ :  $A = -0.9431$ ,  $B = 283.22$ ; <sup>c</sup> For references, see the original article.

**Table S19.** Shielding constants calculated within GIAO-DFT(B3PW91)/pcS-1 approach taking into account solvent and relativistic corrections, together with scaled  $\delta(^{31}\text{P})$  against experiment.

| Molecule | Basic $\sigma_{calc}$ | $\Delta_{solv}\sigma$ | $\Delta_{rel}\sigma$ | $\sigma_{calc}(total)$ | $\delta_{scaled}^b$ | $\delta_{exp}$ | Ref. <sup>c</sup> |
|----------|-----------------------|-----------------------|----------------------|------------------------|---------------------|----------------|-------------------|
| <b>1</b> | 33.7659               | 7.2553                | 10.5639              | 51.5851                | 256.1064            | 263.3          | [63]              |
| <b>2</b> | 336.1156              | 2.0625                | 11.5824              | 349.7605               | -23.9101            | -12            | [64]              |
| <b>3</b> | 165.8695              | -7.3320               | 12.6304              | 171.1679               | 143.8062            | 139            | [65]              |
| <b>4</b> | 37.3288               | -1.0980               | 9.9063               | 46.1371                | 261.2226            | 265.1          | [66]              |
|          | 17.3474               | 2.8710                | 10.0887              | 30.3071                | 276.0886            | 279.5          |                   |
| <b>5</b> | 217.4449              | 1.1886                | 12.0950              | 230.7285               | 87.8729             | 82.8           | [67]              |



|                 |          |         |         |          |           |        |          |
|-----------------|----------|---------|---------|----------|-----------|--------|----------|
| 6               | 233.6798 | 11.7667 | 12.3738 | 257.8203 | 62.4310   | 63     | [68]     |
| 7               | 293.6373 | -3.8378 | 14.4231 | 304.2226 | 18.8546   | 21.3   | [69]     |
| 8 <sup>a</sup>  | 540.2228 | 0.8210  | 15.0480 | 556.0918 | -217.6758 | -203.2 | [70]     |
| 9               | 330.3883 | -2.5516 | 13.3471 | 341.1838 | -15.8557  | -32    | [71]     |
| 10              | 353.1838 | 4.8490  | 12.7239 | 370.7567 | -43.6276  | -61    | [64]     |
| 11              | 289.6351 | -6.3940 | 14.8160 | 298.0571 | 24.6446   | 31.5   | [72]     |
| 12              | 584.5810 | 0.0000  | 14.3551 | 598.9361 | -257.9109 | -266.1 | [73]     |
| 13              | 278.7932 | 0.8800  | 13.2638 | 292.9370 | 29.4529   | 23.5   | [74]     |
| 14              | 80.0124  | -3.8995 | 11.1085 | 87.2214  | 222.6404  | 211    | [75]     |
| 15              | 355.4402 | -3.2885 | 13.5291 | 365.6808 | -38.8608  | -49.2  | [76, 77] |
| 16              | 383.5192 | 0.0000  | 14.3417 | 397.8609 | -69.0812  | -63.36 | [73]     |
| 17              | 271.2768 | -3.0758 | 61.1792 | 329.3802 | -4.7709   | 5.74   | [78]     |
| 18              | 279.3465 | -5.8900 | 21.3094 | 294.7659 | 27.7353   | 30.57  | [79]     |
| 19 <sup>a</sup> | 306.1648 | -4.0623 | 14.1829 | 316.2853 | 7.5264    | 17.7   | [80]     |
| 20 <sup>a</sup> | 394.0698 | 1.1240  | 14.0426 | 409.2364 | -79.7639  | -80.5  | [81]     |

<sup>a</sup> Conformational averaging; <sup>b</sup> Parameters of linear model  $\delta_{scaled} = A\sigma_{calc}(total) + B$ :  $A = -0.9391$ ,  $B = 304.55$ ; <sup>c</sup> For references, see the original article.

**Table S20.** Shielding constants calculated within GIAO-DFT(B3PW91)/pcS-2 approach taking into account solvent and relativistic corrections, together with scaled  $\delta(^{31}\text{P})$  against experiment.

| Molecule        | Basic $\sigma_{calc}$ | $\Delta_{solv}\sigma$ | $\Delta_{rel}\sigma$ | $\sigma_{calc}(total)$ | $\delta_{scaled}^b$ | $\delta_{exp}$ | Ref. <sup>c</sup> |
|-----------------|-----------------------|-----------------------|----------------------|------------------------|---------------------|----------------|-------------------|
| 1               | 28.8127               | 7.9933                | 10.5639              | 47.3699                | 258.0976            | 263.3          | [63]              |
| 2               | 328.6830              | -0.0960               | 11.5824              | 340.1694               | -17.7196            | -12            | [64]              |
| 3               | 163.3143              | -3.7303               | 12.6304              | 172.2144               | 140.4940            | 139            | [65]              |
| 4               | 26.9986               | 3.3044                | 9.9063               | 40.2093                | 264.8428            | 265.1          | [66]              |
|                 | 10.3555               | -0.0827               | 10.0887              | 20.3615                | 283.5395            | 279.5          |                   |
| 5               | 210.6712              | 8.9060                | 12.0950              | 231.6722               | 84.4848             | 82.8           | [67]              |
| 6               | 231.0302              | 12.0334               | 12.3738              | 255.4374               | 62.0980             | 63             | [68]              |
| 7               | 288.0140              | -3.7399               | 14.4231              | 298.6972               | 21.3472             | 21.3           | [69]              |
| 8 <sup>a</sup>  | 537.4892              | 0.5110                | 15.0480              | 553.0482               | -218.2514           | -203.2         | [70]              |
| 9               | 328.7868              | -1.2592               | 13.3471              | 340.8747               | -18.3840            | -32            | [71]              |
| 10              | 352.7460              | 10.3669               | 12.7239              | 375.8368               | -51.3183            | -61            | [64]              |
| 11              | 282.3070              | -6.2767               | 14.8160              | 290.8463               | 28.7428             | 31.5           | [72]              |
| 12              | 582.0446              | 0.0000                | 14.3551              | 596.3997               | -259.0885           | -266.1         | [73]              |
| 13              | 275.6732              | 0.7897                | 13.2638              | 289.7267               | 29.7974             | 23.5           | [74]              |
| 14              | 79.4360               | 9.9751                | 11.1085              | 100.5196               | 208.0305            | 211            | [75]              |
| 15              | 357.8838              | -0.7286               | 13.5291              | 370.6843               | -46.4646            | -49.2          | [76, 77]          |
| 16              | 375.7788              | 0.0000                | 14.3417              | 390.1205               | -64.7735            | -63.36         | [73]              |
| 17              | 264.5887              | -2.9480               | 61.1792              | 322.8199               | -1.3763             | 5.74           | [78]              |
| 18              | 274.1511              | -5.5027               | 21.3094              | 289.9578               | 29.5798             | 30.57          | [79]              |
| 19 <sup>a</sup> | 299.6692              | -3.8569               | 14.1829              | 309.9952               | 10.7046             | 17.7           | [80]              |
| 20 <sup>a</sup> | 388.9550              | 0.9206                | 14.0426              | 403.9182               | -77.7709            | -80.5          | [81]              |

<sup>a</sup> Conformational averaging; <sup>b</sup> Parameters of linear model  $\delta_{scaled} = A\sigma_{calc}(total) + B$ :  $A = -0.942$ ,  $B = 302.72$ ; <sup>c</sup> For references, see the original article.

**Table S21.** Shielding constants calculated within GIAO-DFT(B3PW91)/pcS-1 approach taking into account solvent and relativistic corrections, together with scaled  $\delta(^{31}\text{P})$  against experiment.

| Molecule        | Basic $\sigma_{\text{calc}}$ | $\Delta_{\text{solv}}\sigma$ | $\Delta_{\text{rel}}\sigma$ | $\sigma_{\text{calc}}(\text{total})$ | $\delta_{\text{scaled}}^{\text{b}}$ | $\delta_{\text{exp}}$ | Ref. <sup>c</sup> |
|-----------------|------------------------------|------------------------------|-----------------------------|--------------------------------------|-------------------------------------|-----------------------|-------------------|
| 1               | 50.6688                      | 8.0124                       | 9.6765                      | 68.3577                              | 258.0859                            | 263.3                 | [63]              |
| 2               | 346.4606                     | 3.9969                       | 10.4897                     | 360.9472                             | -17.1530                            | -12                   | [64]              |
| 3               | 189.4532                     | -6.7244                      | 11.8594                     | 194.5882                             | 139.3409                            | 139                   | [65]              |
| 4               | 53.1768                      | -1.9425                      | 9.1412                      | 60.3755                              | 265.5948                            | 265.1                 | [66]              |
|                 | 33.3151                      | 2.7902                       | 9.3077                      | 45.4130                              | 279.6700                            | 279.5                 |                   |
| 5               | 228.8563                     | 4.1595                       | 11.1562                     | 244.1720                             | 92.6974                             | 82.8                  | [67]              |
| 6               | 247.8908                     | 11.9483                      | 11.5186                     | 271.3577                             | 67.1238                             | 63                    | [68]              |
| 7               | 317.8178                     | -3.5997                      | 13.5321                     | 327.7502                             | 14.0754                             | 21.3                  | [69]              |
| 8 <sup>a</sup>  | 551.0218                     | 1.6986                       | 14.4035                     | 567.1239                             | -211.1034                           | -203.2                | [70]              |
| 9               | 329.9097                     | -4.5667                      | 12.2344                     | 337.5774                             | 4.8309                              | -32                   | [71]              |
| 10              | 352.1899                     | 1.4062                       | 11.6816                     | 365.2777                             | -21.2267                            | -61                   | [64]              |
| 11              | 321.1236                     | -5.7166                      | 13.7868                     | 329.1938                             | 12.7174                             | 31.5                  | [72]              |
| 12              | 595.8713                     | 0.0000                       | 14.0566                     | 609.9279                             | -251.3692                           | -266.1                | [73]              |
| 13              | 303.2665                     | 1.3870                       | 12.2510                     | 316.9045                             | 24.2779                             | 23.5                  | [74]              |
| 14              | 99.4084                      | 0.6723                       | 10.1145                     | 110.1952                             | 218.7294                            | 211                   | [75]              |
| 15              | 381.9292                     | -1.2959                      | 12.6025                     | 393.2358                             | -47.5269                            | -49.2                 | [76, 77]          |
| 16              | 409.4373                     | 0.0000                       | 13.2083                     | 422.6456                             | -75.1927                            | -63.36                | [73]              |
| 17              | 304.7654                     | -2.9772                      | 60.3884                     | 362.1766                             | -18.3095                            | 5.74                  | [78]              |
| 18              | 313.3136                     | -5.8256                      | 20.2116                     | 327.6996                             | 14.1230                             | 30.57                 | [79]              |
| 19 <sup>a</sup> | 334.2418                     | -3.6899                      | 13.0466                     | 343.5985                             | -0.8331                             | 17.7                  | [80]              |
| 20 <sup>a</sup> | 414.8678                     | 2.3730                       | 12.8660                     | 430.1068                             | -82.2115                            | -80.5                 | [81]              |

<sup>a</sup> Conformational averaging; <sup>b</sup> Parameters of linear model  $\delta_{\text{scaled}} = A\sigma_{\text{calc}}(\text{total}) + B$ ;  $A = -0.9407$ ,  $B = 322.39$ ; <sup>c</sup> For references, see the original article.

**Table S22.** Shielding constants calculated within GIAO-DFT(B3PW91)/pcS-2 approach taking into account solvent and relativistic corrections, together with scaled  $\delta(^{31}\text{P})$  against experiment.

| Molecule       | Basic $\sigma_{\text{calc}}$ | $\Delta_{\text{solv}}\sigma$ | $\Delta_{\text{rel}}\sigma$ | $\sigma_{\text{calc}}(\text{total})$ | $\delta_{\text{scaled}}^{\text{b}}$ | $\delta_{\text{exp}}$ | Ref. <sup>c</sup> |
|----------------|------------------------------|------------------------------|-----------------------------|--------------------------------------|-------------------------------------|-----------------------|-------------------|
| 1              | 25.8413                      | 8.3781                       | 9.6765                      | 43.8959                              | 257.0066                            | 263.3                 | [63]              |
| 2              | 328.3584                     | 4.0202                       | 10.4897                     | 342.8683                             | -21.5161                            | -12                   | [64]              |
| 3              | 163.4118                     | -11.2778                     | 11.8594                     | 163.9934                             | 145.1237                            | 139                   | [65]              |
| 4              | 26.4468                      | -3.4086                      | 9.1412                      | 32.1794                              | 267.9217                            | 265.1                 | [66]              |
|                | 11.7405                      | 4.3669                       | 9.3077                      | 25.4151                              | 274.2233                            | 279.5                 |                   |
| 5              | 209.4728                     | 3.4274                       | 11.1562                     | 224.0564                             | 89.1691                             | 82.8                  | [67]              |
| 6              | 229.0894                     | 12.5837                      | 11.5186                     | 253.1917                             | 62.0266                             | 63                    | [68]              |
| 7              | 290.4577                     | -3.7970                      | 13.5321                     | 300.1928                             | 18.2404                             | 21.3                  | [69]              |
| 8 <sup>a</sup> | 534.6781                     | 1.1833                       | 14.4035                     | 550.2648                             | -214.7267                           | -203.2                | [70]              |
| 9              | 321.8021                     | -2.6384                      | 12.2344                     | 331.3981                             | -10.8305                            | -32                   | [71]              |
| 10             | 347.3250                     | 9.1924                       | 11.6816                     | 368.1990                             | -45.1142                            | -61                   | [64]              |
| 11             | 287.9009                     | -6.3212                      | 13.7868                     | 295.3665                             | 22.7366                             | 31.5                  | [72]              |
| 12             | 581.3781                     | 0.0000                       | 14.0566                     | 595.4347                             | -256.8070                           | -266.1                | [73]              |
| 13             | 276.0616                     | 0.9758                       | 12.2510                     | 289.2884                             | 28.3989                             | 23.5                  | [74]              |

|                       |          |         |         |          |          |        |          |
|-----------------------|----------|---------|---------|----------|----------|--------|----------|
| <b>14</b>             | 76.6583  | -2.8728 | 10.1145 | 83.9000  | 219.7388 | 211    | [75]     |
| <b>15</b>             | 358.9806 | -3.4344 | 12.6025 | 368.1487 | -45.0673 | -49.2  | [76, 77] |
| <b>16</b>             | 378.7610 | 0.0000  | 13.2083 | 391.9693 | -67.2586 | -63.36 | [73]     |
| <b>17</b>             | 270.3029 | -2.8559 | 60.3884 | 327.8354 | -7.5115  | 5.74   | [78]     |
| <b>18</b>             | 279.9527 | -5.4536 | 20.2116 | 294.7107 | 23.3475  | 30.57  | [79]     |
| <b>19<sup>a</sup></b> | 304.6273 | -3.8558 | 13.0466 | 313.8181 | 5.5471   | 17.7   | [80]     |
| <b>20<sup>a</sup></b> | 389.3622 | 1.5472  | 12.8660 | 403.7754 | -78.2571 | -80.5  | [81]     |

<sup>a</sup> Conformational averaging; <sup>b</sup> Parameters of linear model  $\delta_{scaled} = A\sigma_{calc}(total) + B$ :  $A = -0.9316$ ,  $B = 297.9$ ; <sup>c</sup> For references, see the original article.

**Table S23.** Shielding constants calculated within GIAO-DFT(B3PW91)/pcS-3 approach taking into account solvent and relativistic corrections, together with scaled  $\delta(^{31}\text{P})$  against experiment.

| Molecule              | Basic $\sigma_{calc}$ | $\Delta_{solv}\sigma$ | $\Delta_{rel}\sigma$ | $\sigma_{calc}(total)$ | $\delta_{scaled}^b$ | $\delta_{exp}$ | Ref. <sup>c</sup> |
|-----------------------|-----------------------|-----------------------|----------------------|------------------------|---------------------|----------------|-------------------|
| <b>1</b>              | 27.0531               | 8.1634                | 9.6765               | 44.8930                | 255.3526            | 263.3          | [63]              |
| <b>2</b>              | 327.4748              | 3.5661                | 10.4897              | 341.5306               | -22.1519            | -12            | [64]              |
| <b>3</b>              | 162.0092              | -9.5505               | 11.8594              | 164.3181               | 143.6304            | 139            | [65]              |
| <b>4</b>              | 25.0831               | -2.2069               | 9.1412               | 32.0174                | 267.3977            | 265.1          | [66]              |
|                       | 9.1224                | 3.3071                | 9.3077               | 21.7372                | 277.0148            | 279.5          |                   |
| <b>5</b>              | 210.7863              | 3.9009                | 11.1562              | 225.8434               | 86.0735             | 82.8           | [67]              |
| <b>6</b>              | 231.1608              | 12.5167               | 11.5186              | 255.1961               | 58.6140             | 63             | [68]              |
| <b>7</b>              | 286.1815              | -3.7749               | 13.5321              | 295.9387               | 20.4993             | 21.3           | [69]              |
| <b>8<sup>a</sup></b>  | 534.5066              | 0.6538                | 14.4035              | 549.5639               | -216.7670           | -203.2         | [70]              |
| <b>9</b>              | 327.2172              | -4.3831               | 12.2344              | 335.0685               | -16.1066            | -32            | [71]              |
| <b>10</b>             | 350.9514              | 2.4800                | 11.6816              | 365.1130               | -44.2132            | -61            | [64]              |
| <b>11</b>             | 281.3759              | -6.2723               | 13.7868              | 288.8904               | 27.0930             | 31.5           | [72]              |
| <b>12</b>             | 580.9457              | 0.0000                | 14.0566              | 595.0023               | -259.2747           | -266.1         | [73]              |
| <b>13</b>             | 275.1968              | 0.8563                | 12.2510              | 288.3041               | 27.6415             | 23.5           | [74]              |
| <b>14</b>             | 77.2921               | -2.1500               | 10.1145              | 85.2566                | 217.5925            | 211            | [75]              |
| <b>15</b>             | 356.6356              | -2.9904               | 12.6025              | 366.2477               | -45.2747            | -49.2          | [76, 77]          |
| <b>16</b>             | 374.6018              | 0.0000                | 13.2083              | 387.8101               | -65.4463            | -63.36         | [73]              |
| <b>17</b>             | 264.5713              | -2.8941               | 60.3884              | 322.0656               | -3.9424             | 5.74           | [78]              |
| <b>18</b>             | 273.8035              | -5.4289               | 20.2116              | 288.5862               | 27.3776             | 30.57          | [79]              |
| <b>19<sup>a</sup></b> | 298.8459              | -3.8682               | 13.0466              | 308.0243               | 9.1933              | 17.7           | [80]              |
| <b>20<sup>a</sup></b> | 386.5405              | 1.1652                | 12.8660              | 400.5718               | -77.3849            | -80.5          | [81]              |

<sup>a</sup> Conformational averaging; <sup>b</sup> Parameters of linear model  $\delta_{scaled} = A\sigma_{calc}(total) + B$ :  $A = -0.9355$ ,  $B = 297.35$ ; <sup>c</sup> For references, see the original article.

**Table S24.** Shielding constants calculated within GIAO-DFT(OLYP)/pcS-1 approach taking into account solvent and relativistic corrections, together with scaled  $\delta(^{31}\text{P})$  against experiment.

| Molecule | Basic $\sigma_{calc}$ | $\Delta_{solv}\sigma$ | $\Delta_{rel}\sigma$ | $\sigma_{calc}(total)$ | $\delta_{scaled}^b$ | $\delta_{exp}$ | Ref. <sup>c</sup> |
|----------|-----------------------|-----------------------|----------------------|------------------------|---------------------|----------------|-------------------|
| <b>1</b> | 55.941                | 5.9749                | 10.5639              | 72.4798                | 257.9149            | 263.3          | [63]              |
| <b>2</b> | 339.4907              | 2.0823                | 11.5824              | 353.1554               | -21.8906            | -12            | [64]              |
| <b>3</b> | 177.3952              | -6.6751               | 12.6304              | 183.3505               | 147.3879            | 139            | [65]              |

|                 |          |         |         |          |           |        |          |
|-----------------|----------|---------|---------|----------|-----------|--------|----------|
| 4               | 61.3919  | -0.6858 | 9.9063  | 70.6124  | 259.7765  | 265.1  | [66]     |
|                 | 43.2864  | 2.8058  | 10.0887 | 56.1809  | 274.1633  | 279.5  |          |
| 5               | 232.7881 | -0.1383 | 12.0950 | 244.7448 | 86.1839   | 82.8   | [67]     |
| 6               | 241.4724 | 10.0168 | 12.3738 | 263.8630 | 67.1250   | 63     | [68]     |
| 7               | 304.3452 | -3.8229 | 14.4231 | 314.9454 | 16.2009   | 21.3   | [69]     |
| 8 <sup>a</sup>  | 527.7959 | 0.6883  | 15.0480 | 543.5322 | -211.6773 | -203.2 | [70]     |
| 9               | 354.8862 | -2.8075 | 13.3471 | 365.4258 | -34.1230  | -32    | [71]     |
| 10              | 376.8819 | 3.7192  | 12.7239 | 393.3250 | -61.9357  | -61    | [64]     |
| 11              | 299.8134 | -6.3517 | 14.8160 | 308.2777 | 22.8480   | 31.5   | [72]     |
| 12              | 576.2332 | 0.0000  | 14.3551 | 590.5883 | -258.5875 | -266.1 | [73]     |
| 13              | 280.7117 | 0.5431  | 13.2638 | 294.5186 | 36.5644   | 23.5   | [74]     |
| 14              | 98.6126  | -5.0512 | 11.1085 | 104.6699 | 225.8246  | 211    | [75]     |
| 15              | 356.4139 | -2.3368 | 13.5291 | 367.6062 | -36.2966  | -49.2  | [76, 77] |
| 16              | 377.9738 | 0.0000  | 14.3417 | 392.3155 | -60.9293  | -63.36 | [73]     |
| 17              | 279.0281 | -3.9975 | 61.1792 | 336.2098 | -4.9975   | 5.74   | [78]     |
| 18              | 287.979  | -7.0464 | 21.3094 | 302.2420 | 28.8650   | 30.57  | [79]     |
| 19 <sup>a</sup> | 314.964  | -3.8655 | 14.1829 | 325.2815 | 5.8969    | 17.7   | [80]     |
| 20 <sup>a</sup> | 388.1038 | 1.0356  | 14.0426 | 403.1821 | -71.7622  | -80.5  | [81]     |

<sup>a</sup> Conformational averaging; <sup>b</sup> Parameters of linear model  $\delta_{scaled} = A\sigma_{calc}(total) + B$ :  $A = -0.9969$ ,  $B = 330.17$ ; <sup>c</sup> For references, see the original article.

**Table S25.** Shielding constants calculated within GIAO-DFT(OLYP)/pcS-2 approach taking into account solvent and relativistic corrections, together with scaled  $\delta(^{31}\text{P})$  against experiment.

| Molecule        | Basic $\sigma_{calc}$ | $\Delta_{solv}\sigma$ | $\Delta_{rel}\sigma$ | $\sigma_{calc}(total)$ | $\delta_{scaled}^b$ | $\delta_{exp}$ | Ref. <sup>c</sup> |
|-----------------|-----------------------|-----------------------|----------------------|------------------------|---------------------|----------------|-------------------|
| 1               | 54.6080               | 7.4532                | 10.5639              | 72.6251                | 257.5728            | 263.3          | [63]              |
| 2               | 332.3153              | -0.0675               | 11.5824              | 343.8302               | -12.8187            | -12            | [64]              |
| 3               | 175.3382              | -4.4629               | 12.6304              | 183.5057               | 147.0248            | 139            | [65]              |
| 4               | 53.1610               | 3.2470                | 9.9063               | 66.3143                | 263.8646            | 265.1          | [66]              |
|                 | 40.2158               | 0.0841                | 10.0887              | 50.3886                | 279.7426            | 279.5          |                   |
| 5               | 230.4250              | 7.6621                | 12.0950              | 250.1821               | 80.5484             | 82.8           | [67]              |
| 6               | 241.9006              | 10.9632               | 12.3738              | 265.2376               | 65.5381             | 63             | [68]              |
| 7               | 298.5780              | -3.7956               | 14.4231              | 309.2055               | 21.7021             | 21.3           | [69]              |
| 8 <sup>a</sup>  | 529.2636              | 0.5190                | 15.0480              | 544.8305               | -213.2160           | -203.2         | [70]              |
| 9               | 358.8724              | -0.9095               | 13.3471              | 371.3100               | -40.2161            | -32            | [71]              |
| 10              | 380.7573              | 10.6020               | 12.7239              | 404.0832               | -72.8910            | -61            | [64]              |
| 11              | 290.9953              | -6.2263               | 14.8160              | 299.5850               | 31.2938             | 31.5           | [72]              |
| 12              | 579.9084              | 0.0000                | 14.3551              | 594.2635               | -262.5007           | -266.1         | [73]              |
| 13              | 280.2978              | 0.6595                | 13.2638              | 294.2211               | 36.6416             | 23.5           | [74]              |
| 14              | 104.2787              | 8.6244                | 11.1085              | 124.0116               | 206.3404            | 211            | [75]              |
| 15              | 362.8659              | -0.7814               | 13.5291              | 375.6136               | -44.5068            | -49.2          | [76, 77]          |
| 16              | 372.2725              | 0.0000                | 14.3417              | 386.6142               | -55.4744            | -63.36         | [73]              |
| 17              | 272.0847              | -3.7799               | 61.1792              | 329.4840               | 1.4845              | 5.74           | [78]              |
| 18              | 282.3178              | -6.5038               | 21.3094              | 297.1234               | 33.7480             | 30.57          | [79]              |
| 19 <sup>a</sup> | 307.8456              | -3.6599               | 14.1829              | 318.3686               | 12.5665             | 17.7           | [80]              |
| 20 <sup>a</sup> | 385.9133              | 1.0771                | 14.0426              | 401.0330               | -69.8499            | -80.5          | [81]              |

<sup>a</sup> Conformational averaging; <sup>b</sup> Parameters of linear model  $\delta_{scaled} = A\sigma_{calc}(total) + B$ :  $A = -0.997$ ,  $B = 329.98$ ; <sup>c</sup> For references, see the original article.

**Table S26.** Shielding constants calculated within GIAO-DFT(OLYP)/pcS-1 approach taking into account solvent and relativistic corrections, together with scaled  $\delta(^{31}\text{P})$  against experiment.

| Molecule        | Basic $\sigma_{calc}$ | $\Delta_{solv}\sigma$ | $\Delta_{rel}\sigma$ | $\sigma_{calc}(total)$ | $\delta_{scaled}^b$ | $\delta_{exp}$ | Ref. <sup>c</sup> |
|-----------------|-----------------------|-----------------------|----------------------|------------------------|---------------------|----------------|-------------------|
| 1               | 72.0384               | 7.6855                | 9.6765               | 89.4004                | 259.4265            | 263.3          | [55]              |
| 2               | 345.6464              | 3.6542                | 10.4897              | 359.7903               | -13.1806            | -12            | [56]              |
| 3               | 198.0928              | -6.3147               | 11.8594              | 203.6375               | 144.2527            | 139            | [57]              |
| 4               | 73.8913               | -1.0630               | 9.1412               | 81.9695                | 266.9184            | 265.1          | [58]              |
|                 | 57.4842               | 2.8405                | 9.3077               | 69.6324                | 279.3566            | 279.5          | [58]              |
| 5               | 240.7035              | 3.7947                | 11.1562              | 255.6544               | 91.8092             | 82.8           | [59]              |
| 6               | 251.6185              | 11.2172               | 11.5186              | 274.3543               | 72.9560             | 63             | [60]              |
| 7               | 327.6890              | -3.6725               | 13.5321              | 337.5486               | 9.2435              | 21.3           | [61]              |
| 8 <sup>a</sup>  | 534.0953              | 1.4729                | 14.4035              | 549.9717               | -204.9214           | -203.2         | [62]              |
| 9               | 355.7999              | -3.5312               | 12.2344              | 364.5031               | -17.9320            | -32            | [63]              |
| 10              | 375.5365              | 1.9401                | 11.6816              | 389.1582               | -42.7893            | -61            | [56]              |
| 11              | 326.4328              | -5.6645               | 13.7868              | 334.5551               | 12.2615             | 31.5           | [64]              |
| 12              | 587.3665              | 0.0000                | 14.0566              | 601.4231               | -256.7948           | -266.1         | [65]              |
| 13              | 302.7153              | 1.2037                | 12.2510              | 316.1700               | 30.7974             | 23.5           | [66]              |
| 14              | 117.2245              | 1.6889                | 10.1145              | 129.0279               | 219.4741            | 211            | [67]              |
| 15              | 380.6925              | -0.5713               | 12.6025              | 392.7237               | -46.3840            | -49.2          | [68, 69]          |
| 16              | 398.3368              | 0.0000                | 13.2083              | 411.5451               | -65.3598            | -63.36         | [65]              |
| 17              | 306.1093              | -3.8255               | 60.3884              | 362.6722               | -16.0861            | 5.74           | [70]              |
| 18              | 315.5366              | -6.9396               | 20.2116              | 328.8086               | 18.0552             | 30.57          | [71]              |
| 19 <sup>a</sup> | 339.6016              | -3.5567               | 13.0466              | 349.0914               | -2.3940             | 17.7           | [72]              |
| 20 <sup>a</sup> | 403.1144              | 2.2743                | 12.8660              | 418.2548               | -72.1244            | -80.5          | [73]              |

<sup>a</sup> Conformational averaging; <sup>b</sup> Parameters of linear model  $\delta_{scaled} = A\sigma_{calc}(total) + B$ :  $A = -1.0082$ ,  $B = 349.56$ ; <sup>c</sup> For references, see the original article.

**Table S27.** Shielding constants calculated within GIAO-DFT(OLYP)/pcS-2 approach taking into account solvent and relativistic corrections, together with scaled  $\delta(^{31}\text{P})$  against experiment.

| Molecule       | Basic $\sigma_{calc}$ | $\Delta_{solv}\sigma$ | $\Delta_{rel}\sigma$ | $\sigma_{calc}(total)$ | $\delta_{scaled}^b$ | $\delta_{exp}$ | Ref. <sup>c</sup> |
|----------------|-----------------------|-----------------------|----------------------|------------------------|---------------------|----------------|-------------------|
| 1              | 54.6707               | 7.9901                | 9.6765               | 72.3373                | 257.0291            | 263.3          | [55]              |
| 2              | 332.1064              | 3.8645                | 10.4897              | 346.4606               | -15.1754            | -12            | [56]              |
| 3              | 178.4614              | -10.6898              | 11.8594              | 179.6310               | 150.4864            | 139            | [57]              |
| 4              | 55.5391               | -2.1724               | 9.1412               | 62.5079                | 266.7897            | 265.1          | [58]              |
|                | 44.5954               | 4.2455                | 9.3077               | 58.1486                | 271.1184            | 279.5          | [58]              |
| 5              | 231.3854              | 3.1386                | 11.1562              | 245.6802               | 84.8996             | 82.8           | [59]              |
| 6              | 240.7573              | 11.7223               | 11.5186              | 263.9982               | 66.7098             | 63             | [60]              |
| 7              | 303.7987              | -3.8486               | 13.5321              | 313.4822               | 17.5722             | 21.3           | [61]              |
| 8 <sup>a</sup> | 527.5029              | 1.0289                | 14.4035              | 542.9353               | -210.2747           | -203.2         | [62]              |
| 9              | 353.6079              | -2.1596               | 12.2344              | 363.6827               | -32.2769            | -32            | [63]              |
| 10             | 376.8895              | 9.1962                | 11.6816              | 397.7673               | -66.1229            | -61            | [56]              |
| 11             | 298.8863              | -6.1758               | 13.7868              | 306.4973               | 24.5082             | 31.5           | [64]              |
| 12             | 582.1130              | 0.0000                | 14.0566              | 596.1696               | -263.1364           | -266.1         | [65]              |

|                       |          |         |         |          |          |        |          |
|-----------------------|----------|---------|---------|----------|----------|--------|----------|
| <b>13</b>             | 281.2750 | 0.8784  | 12.2510 | 294.4044 | 36.5164  | 23.5   | [66]     |
| <b>14</b>             | 103.2507 | -1.6031 | 10.1145 | 111.7621 | 217.8802 | 211    | [67]     |
| <b>15</b>             | 364.7515 | -2.5945 | 12.6025 | 374.7595 | -43.2762 | -49.2  | [68, 69] |
| <b>16</b>             | 375.5964 | 0.0000  | 13.2083 | 388.8047 | -57.2231 | -63.36 | [65]     |
| <b>17</b>             | 279.5883 | -3.6815 | 60.3884 | 336.2952 | -5.0811  | 5.74   | [70]     |
| <b>18</b>             | 289.9774 | -6.4374 | 20.2116 | 303.7516 | 27.2347  | 30.57  | [71]     |
| <b>19<sup>a</sup></b> | 315.0952 | -3.5855 | 13.0466 | 324.5562 | 6.5757   | 17.7   | [72]     |
| <b>20<sup>a</sup></b> | 384.9026 | 1.7770  | 12.8660 | 399.5457 | -67.8888 | -80.5  | [73]     |

<sup>a</sup> Conformational averaging; <sup>b</sup> Parameters of linear model  $\delta_{scaled} = A\sigma_{calc}(total) + B$ :  $A = -0.993$ ,  $B = 328.86$ ; <sup>c</sup> For references, see the original article.

**Table S28.** Shielding constants calculated within GIAO-DFT(OLYP)/pcS-3 approach taking into account solvent and relativistic corrections, together with scaled  $\delta(^{31}\text{P})$  against experiment.

| Molecule              | Basic $\sigma_{calc}$ | $\Delta_{solv}\sigma$ | $\Delta_{rel}\sigma$ | $\sigma_{calc}(total)$ | $\delta_{scaled}^b$ | $\delta_{exp}$ | Ref. <sup>c</sup> |
|-----------------------|-----------------------|-----------------------|----------------------|------------------------|---------------------|----------------|-------------------|
| <b>1</b>              | 52.4071               | 7.5884                | 9.6765               | 69.6720                | 255.9351            | 263.3          | [55]              |
| <b>2</b>              | 329.3193              | 3.5362                | 10.4897              | 343.3452               | -16.1781            | -12            | [56]              |
| <b>3</b>              | 173.6816              | -8.8832               | 11.8594              | 176.6578               | 149.5591            | 139            | [57]              |
| <b>4</b>              | 51.3130               | -0.9946               | 9.1412               | 59.4596                | 266.0893            | 265.1          | [58]              |
|                       | 39.3983               | 3.2622                | 9.3077               | 51.9682                | 273.5380            | 279.5          | [58]              |
| <b>5</b>              | 230.4731              | 3.7520                | 11.1562              | 245.3813               | 81.2274             | 82.8           | [59]              |
| <b>6</b>              | 241.3356              | 11.5072               | 11.5186              | 264.3614               | 62.3555             | 63             | [60]              |
| <b>7</b>              | 296.5465              | -3.8478               | 13.5321              | 306.2308               | 20.7247             | 21.3           | [61]              |
| <b>8<sup>a</sup></b>  | 525.7664              | 0.4553                | 14.4035              | 540.6251               | -212.3336           | -203.2         | [62]              |
| <b>9</b>              | 356.1479              | -3.4742               | 12.2344              | 364.9081               | -37.6181            | -32            | [63]              |
| <b>10</b>             | 378.3104              | 2.6183                | 11.6816              | 392.6103               | -65.1624            | -61            | [56]              |
| <b>11</b>             | 289.6853              | -6.2023               | 13.7868              | 297.2698               | 29.6346             | 31.5           | [64]              |
| <b>12</b>             | 579.3670              | 0.0000                | 14.0566              | 593.4236               | -264.8311           | -266.1         | [65]              |
| <b>13</b>             | 278.6282              | 0.7235                | 12.2510              | 291.6027               | 35.2694             | 23.5           | [66]              |
| <b>14</b>             | 100.8938              | -0.3534               | 10.1145              | 110.6549               | 215.1858            | 211            | [67]              |
| <b>15</b>             | 360.9068              | -1.9093               | 12.6025              | 371.6000               | -44.2719            | -49.2          | [68, 69]          |
| <b>16</b>             | 369.9954              | 0.0000                | 13.2083              | 383.2037               | -55.8094            | -63.36         | [65]              |
| <b>17</b>             | 271.5753              | -3.6647               | 60.3884              | 328.2990               | -1.2177             | 5.74           | [70]              |
| <b>18</b>             | 281.5207              | -6.2993               | 20.2116              | 295.4330               | 31.4610             | 30.57          | [71]              |
| <b>19<sup>a</sup></b> | 307.1315              | -3.6506               | 13.0466              | 316.5275               | 10.4867             | 17.7           | [72]              |
| <b>20<sup>a</sup></b> | 380.6366              | 1.2882                | 12.8660              | 394.7908               | -67.3305            | -80.5          | [73]              |

<sup>a</sup> Conformational averaging; <sup>b</sup> Parameters of linear model  $\delta_{scaled} = A\sigma_{calc}(total) + B$ :  $A = -0.9943$ ,  $B = 325.21$ ; <sup>c</sup> For references, see the original article.
